1 **Title:**

2 Metabolic co-dependence drives the evolutionary ancient *Hydra-Chlorella* symbiosis

3

4 **Authors:**

5 Mayuko Hamada <sup>1,3\*</sup>, Katja Schröder <sup>2\*</sup>, Jay Bathia <sup>2</sup>, Ulrich Kürn <sup>2</sup>, Sebastian Fraune <sup>2</sup>, Mariia  
6 Khalturina <sup>1</sup>, Konstantin Khalturin <sup>1</sup>, Chuya Shinzato <sup>1</sup>, Nori Satoh <sup>1</sup>, Thomas C.G. Bosch <sup>2</sup>

7

8 **Affiliations:**

9 <sup>1</sup> Marine Genomics Unit, Okinawa Institute of Science and Technology Graduate University  
10 (OIST), 1919-1 Tancha, Onna-son, Kunigami-gun, Okinawa, 904-0495 Japan

11 <sup>2</sup> Zoological Institute and Interdisciplinary Research Center Kiel Life Science, Kiel University,  
12 Am Botanischen Garten 1-9, 24118 Kiel, Germany

13 <sup>3</sup> Ushimado Marine Institute, Okayama University, 130-17 Kashino, Ushimado, Setouchi,  
14 Okayama, 701-4303 Japan

15

16 \* Authors contributed equally

17

18 **Corresponding author:**

19 Thomas C. G. Bosch

20 Zoological Institute, Kiel University

21 Am Botanischen Garten 1-9

22 24118 Kiel

23 TEL: +49 431 880 4172

24 [tbosch@zoologie.uni-kiel.de](mailto:tbosch@zoologie.uni-kiel.de)

25 **Abstract (148 words)**

26

27 Many multicellular organisms rely on symbiotic associations for support of metabolic activity,  
28 protection, or energy. Understanding the mechanisms involved in controlling such interactions  
29 remains a major challenge. In an unbiased approach we identified key players that control the  
30 symbiosis between *Hydra viridissima* and its photobiont *Chlorella* sp. A99. We discovered  
31 significant upregulation of *Hydra* genes encoding a phosphate transporter and glutamine  
32 synthetase suggesting regulated nutrition supply between host and symbionts. Interestingly,  
33 supplementing the medium with glutamine temporarily supports in vitro growth of the otherwise  
34 obligate symbiotic *Chlorella*, indicating loss of autonomy and dependence on the host.  
35 Genome sequencing of *Chlorella* A99 revealed a large number of amino acid transporters and  
36 a degenerated nitrate assimilation pathway, presumably as consequence of the adaptation to  
37 the host environment. Our observations portray ancient symbiotic interactions as a  
38 codependent partnership in which exchange of nutrients appears to be the primary driving  
39 force.

40

## 41 Introduction

42

43 Symbiosis has been a prevailing force throughout the evolution of life, driving the diversification  
44 of organisms and facilitating rapid adaptation of species to divergent new niches (Moran, 2007;  
45 Joy, 2013; McFall-Ngai et al., 2013). In particular, symbiosis with photosynthetic symbiont is  
46 observed in many species of Cnidarians such as coral, jellyfish, sea anemone and hydra,  
47 contributing to the ecological success of these sessile or planktonic animals (Douglas, 1994;  
48 Davy et al., 2012b). Among the many animals dependent on algal symbionts, inter-species  
49 interactions between green hydra *Hydra viridissima* and endosymbiotic unicellular green algae  
50 of the genus *Chlorella* have been a subject of interest for decades (Muscatine and Lenhoff,  
51 1963; Roffman and Lenhoff, 1969). Such studies not only provide insights into the basic "tool  
52 kit" necessary to establish symbiotic interactions, but are also of relevance in understanding  
53 the resulting evolutionary selective processes (Muscatine and Lenhoff, 1965a, b; Thorington  
54 and Margulis, 1981).

55

56 The interactions at play here are clearly metabolic: the algae depend on nutrients that are  
57 derived from the host or from the environment surrounding the host, while in return the host  
58 receives a significant amount of photosynthetically fixed carbon from the algae. Previous  
59 studies have provided evidence that the photosynthetic symbionts provide their host with  
60 maltose, enabling *H. viridissima* to survive periods of starvation (Muscatine and Lenhoff, 1963;  
61 Muscatine, 1965; Roffman and Lenhoff, 1969; Cook and Kelty, 1982; Huss et al., 1993/1994).  
62 *Chlorella*-to-*Hydra* translocation of photosynthates is critical for polyps to grow (Muscatine and  
63 Lenhoff, 1965b; Mews, 1980; Douglas and Smith, 1983; Douglas and Smith, 1984). Presence  
64 of symbiotic algae also has a profound impact on hydra's fitness by promoting oogenesis  
65 (Habetha et al., 2003; Habetha and Bosch, 2005).

66

67 Pioneering studies performed in the 1980s (McAuley and Smith, 1982; Rahat and Reich, 1984)  
68 showed that there is a great deal of adaptation and specificity in this symbiotic relationship. All  
69 endosymbiotic algae found in a single host polyp are clonal and proliferation of symbiont and  
70 host is tightly correlated (Bossert and Dunn, 1986; McAuley, 1986a). Although it is not yet  
71 known how *Hydra* controls cell division in symbiotic *Chlorella*, *Chlorella* strain A99 is unable to  
72 grow outside its polyp host and is transmitted vertically to the next generation of *Hydra*,  
73 indicating loss of autonomy during establishment of its symbiotic relationship with this host  
74 (Muscatine and McAuley, 1982; Campbell, 1990; Habetha et al., 2003).

75

76 Molecular phylogenetic analyses suggest that *H. viridissima* is the most basal species in the  
77 genus *Hydra* and that symbiosis with *Chlorella* was established in the ancestral *viridissima*  
78 group after their divergence from non-symbiotic hydra groups (Martinez et al., 2010;

79 Schwentner and Bosch, 2015). A recent phylogenetic analysis of different strains of green  
80 hydra resulted in a phylogenetic tree that is topologically equivalent to that of their symbiotic  
81 algae (Kawaida et al., 2013), suggesting these species co-evolved as a result of their symbiotic  
82 relationship. Although our understanding of the factors that promote symbiotic relationships in  
83 cnidarians has increased (Shinzato et al., 2011; Davy et al., 2012a; Lehnert et al., 2014;  
84 Baumgarten et al., 2015; Ishikawa et al., 2016), very little is known about the molecular  
85 mechanisms allowing this partnership to persist over millions of years.

86

87 Recent advances in transcriptome and genome analysis allowed us to identify the metabolic  
88 interactions and genomic evolution involved in achieving the *Hydra-Chlorella* symbiotic  
89 relationship. We present here the first characterization, to our knowledge, of genetic  
90 complementarity between green *Hydra* and *Chlorella* algae that explains the emergence  
91 and/or maintenance of a stable symbiosis. We also provide here the first report of the complete  
92 genome sequence from an obligate intracellular *Chlorella* photobiont. Together, our results  
93 show that exchange of nutrients is the primary driving force for the symbiosis between *Chlorella*  
94 and *Hydra*. Subsequently, reduction of metabolic pathways may have further strengthened  
95 their codependency. Our findings provide a framework for understanding the evolution of a  
96 highly codependent symbiotic partnership in an early emerging metazoan.

97

98

## 99 **Results**

100

### 101 **Discovery of symbiosis-dependent *Hydra* genes**

102

103 As tool for our study we used the green hydra *H. viridissima* (**Figure 1A**) colonized with  
104 symbiotic *Chlorella* sp. strain A99 (abbreviated here as Hv\_Sym), aposymbiotic *H. viridissima*  
105 from which the symbiotic *Chlorella* were removed (Hv\_Apo), and aposymbiotic *H. viridissima*  
106 which had been artificially infected with *Chlorella variabilis* NC64A (Hv\_NC64A). The latter is  
107 symbiotic to the single-cellular protist Paramecium (Karakashian and Karakashian, 1965).  
108 Although an association between *H. viridissima* and *Chlorella* NC64A can be maintained for  
109 some time, both their growth rate (**Figure 1B**) and the number of NC64A algae per *Hydra* cell  
110 (**Supplementary Figure 1**) is significantly reduced compared to the symbiosis with native  
111 symbiotic *Chlorella* A99.

112

113 *H. viridissima* genes involved in the symbiosis with *Chlorella* were identified by microarray  
114 based on the contigs of *Hydra viridissima* A99 transcriptome (NCBI GEO Platform ID:  
115 GPL23280). For the microarray analysis, total RNA was extracted from the polyps after light  
116 exposure for six hours. By comparing the transcriptomes of Hv\_Sym and Hv\_Apo, we identified



117 423 contigs that are upregulated and 256 contigs that are downregulated in presence of  
118 *Chlorella* A99 (**Figure 1C**). To exclude genes involved in oogenesis and embryogenesis, only  
119 contigs differently expressed with similar patterns in both sexual and asexual Hv\_Sym were  
120 recorded. Interestingly, contigs whose predicted products had no discernible homologs in other  
121 organisms including other *Hydra* species were overrepresented in these differentially  
122 expressed contigs (Chi-squared test  $P < 0.001$ ) (**Supplementary Figure 2**). Such  
123 taxonomically restricted genes (TRGs) are thought to play important roles in the development  
124 of evolutionary novelties and morphological diversity within a given taxonomic group (Khalturin  
125 et al., 2009; Tautz and Domazet-Lošo, 2011).

126  
127 We further characterized functions of the differentially expressed *Hydra* genes by Gene  
128 Ontology (GO) terms (The Gene Ontology et al., 2000). This demonstrated overrepresentation  
129 of genes with GO term “localization” in upregulated contigs (Hv\_Sym > Hv\_Apo) and with GO  
130 term “metabolic process” in downregulated contigs (Hv\_Sym < Hv\_Apo) (**Figure 1D**). More  
131 specifically, the upregulated contigs include many genes related to “transmembrane  
132 transporter activity”, “transmembrane transport”, “transposition”, “cilium” and “protein binding,  
133 bridging” (**Figure 1E**). In the downregulated contig set, the GO classes “cellular amino acid  
134 metabolic process”, “cell wall organization or biogenesis” and “peptidase activity” are  
135 overrepresented (**Figure 1E**). These results suggest that the *Chlorella* photobiont affects core  
136 metabolic processes and pathways in *Hydra*. Particularly, carrier proteins and active  
137 membrane transport appears to play a prominent role in the symbiosis.

138  
139 To narrow down the number of genes specifically affected by the presence of *Chlorella* A99,  
140 we identified 12 contigs that are differentially expressed in presence of *Chlorella* A99 but not  
141 in presence of *Chlorella* NC64A (**Figure 1C** A99-specific). Independent qPCR confirmed the  
142 differential expression pattern for 10 of these genes (**Supplementary Table 1**). The genes  
143 upregulated by the presence of the photobiont encode a Spot\_14 protein, a glutamine  
144 synthetase (GS) and a sodium-dependent phosphate (Na/Pi) transport protein in addition to a  
145 *H. viridissima* specific gene (rc\_12891: *Sym-1*) and a *Hydra* genus specific gene (rc\_13570:  
146 *Sym-2*) (**Supplementary Table 1**). *Hydra* genes downregulated by the presence of *Chlorella*  
147 A99 were two *H. viridissima* specific genes and three metabolic genes encoding histidine  
148 ammonia-lyase, acetoacetyl-CoA synthetase and 2-isopropylmalate synthase  
149 (**Supplementary Table 1**). Of the upregulated genes, Spot\_14 is described as thyroid  
150 hormone-responsive spot 14 protein reported to be induced by dietary carbohydrates and  
151 glucose in mammals (Tao and Towle, 1986; Brown et al., 1997). Na/Pi transport protein is a  
152 membrane transporter actively transporting phosphate into cells (Murer and Biber, 1996). GS  
153 plays an essential role in the metabolism of nitrogen by catalyzing the reaction between  
154 glutamate and ammonia to form glutamine (Liaw et al., 1995). Interestingly, out of the three

155 GS genes *H. viridissima* contains only GS-1 was found to be upregulated by the presence of  
156 the photobiont (**Supplementary Figure 3**). The discovery of these transcriptional responses  
157 points to an intimate metabolic exchange between the partners in a species-specific manner..  
158

### 159 **Symbiont-dependent *Hydra* genes are upregulated by photosynthetic activity of** 160 ***Chlorella* A99**

161  
162 To test whether photosynthetic activity of the symbiont is required for upregulation of gene  
163 expression, Hv\_Sym was either cultured under a standard 12 hr light/dark alternating regime  
164 or continuously in the dark for 1 to 4 days prior to RNA extraction (**Figure 2A**). Interestingly,  
165 four (*GS1*, *Spot14*, *Na/Pi* and *Sym-1*) of five genes specifically activated by the presence of  
166 *Chlorella* A99 showed significant upregulation when exposed to light (**Figure 2B**), indicating  
167 the relevance of photosynthetic activity of *Chlorella*. This upregulation was strictly dependent  
168 on presence of the algae, as in aposymbiont Hv\_Apo the response was absent (**Figure 2B**).  
169 On the other hand, symbiosis-regulated *Hydra* genes not specific for *Chlorella* A99 (**Figure 1C**  
170 Symbiosis-regulated, **Supplementary Table 2**) appear not to be upregulated in a light-  
171 dependent manner (**Supplementary Figure 4**). These genes are involved in *Hydra*'s innate  
172 immune system (e.g. proteins containing Toll/interleukin-1 receptor domain or Death domain)  
173 or in signal transduction (C-type mannose receptor, ephrin receptor, proline-rich  
174 transmembrane protein 1, "protein-kinase, interferon-inducible double stranded RNA  
175 dependent inhibitor, repressor of (p58 repressor)"). That particular transcriptional changes  
176 observed in *Hydra* rely solely on the photosynthetic activity of *Chlorella* A99 was confirmed by  
177 substituting the dark incubation with selective chemical photosynthesis inhibitor DCMU  
178 (Dichorophenyl-dimethylurea) (Vandermeulen et al., 1972), which resulted in a similar effect  
179 (**Figure 2C, D**).

### 180 181 **Symbiont-dependent *Hydra* genes are expressed in endodermal epithelial cells and** 182 **upregulated by sugars**

183  
184 To further characterize the photobiont induced *Hydra* genes, we performed whole mount *in situ*  
185 hybridization (**Figure 3A-F**) and quantified transcripts by qPCR using templates from isolated  
186 endoderm and ectoderm (**Supplementary Figure 5**), again comparing symbiotic and  
187 aposymbiotic polyps (**Figure 3 G-I**). The GS-1 gene and the Spot14 gene are expressed both  
188 in ectoderm and in endoderm (**Figure 3A, B**) and both genes are strongly upregulated in the  
189 presence of the photobiont (**Figure 3G, H**). In contrast, the Na/Pi gene was expressed only in  
190 the endoderm (**Figure 3C**) and there it was strongly upregulated by the photobiont (**Figure 3I**).  
191 Since *Chlorella* sp. A99 colonizes endodermal epithelial cells only, the impact of algae on  
192 symbiosis-dependent genes in both the ectodermal and the endodermal layer indicates that

193 photosynthetic products can be transported across these two tissue layers or some signals  
194 can be transduced by cell-cell communication.

195

196 To more closely dissect the nature of the functional interaction between *Hydra* and *Chlorella*  
197 and to explore the possibility that maltose released from the algae is involved in A99-specific  
198 gene regulation, we cultured aposymbiotic polyps (Hv\_Apo) for 2 days in medium containing  
199 various concentrations of maltose (**Figure 3J**). Of the five A99 specific genes, GS-1 and the  
200 Spot14 gene were upregulated by maltose in a dose-dependent manner; the Na/Pi gene was  
201 only upregulated in 100mM maltose and the *Hydra* specific genes Sym-1 and Sym-2 did not  
202 show significant changes in expression by exposure to maltose (**Figure 3J**). This provides  
203 strong support for previous views that maltose excretion by symbiotic algae contributes to the  
204 stabilization of this symbiotic association (Cernichiari et al., 1969). When polyps were exposed  
205 to glucose instead of maltose, the genes of interest were also transcriptionally activated in a  
206 dose-dependent manner, while sucrose had no effect (**Supplementary Figure 6A-D**).  
207 Exposure to low concentrations of galactose increased transcriptional activity but at high  
208 concentration it did not, indicating a substrate inhibitor effect for this sugar. That the response  
209 to glucose is similar or even higher compared to maltose after 6 hours of treatment  
210 (**Supplementary Figure 6E**), suggests that *Hydra* cells transform maltose to glucose as a  
211 source of energy.

212

### 213 **The *Chlorella* A99 genome records a symbiotic life style**

214

215 To better understand the symbiosis between *H. viridissima* and *Chlorella* and to refine our  
216 knowledge of the functions that are required in this symbiosis, we sequenced the genome of  
217 *Chlorella* sp. strain A99 and compared it to the genomes of other green algae. The genome of  
218 *Chlorella* sp. A99 was sequenced to approximately 211-fold coverage, enabling the generation  
219 of an assembly comprising a total of 40.9 Mbp (82 scaffolds, N50=1.7Mbp) (**Supplementary**  
220 **Table 3**). *Chlorella* sp. A99 belongs to the family *Chlorellaceae* (**Figure 4A**) and of the green  
221 algae whose genomes have been sequenced it is most closely related to *Chlorella variabilis*  
222 NC64A (NC64A) (Merchant et al., 2007; Palenik et al., 2007; Worden et al., 2009; Blanc et al.,  
223 2010; Prochnik et al., 2010; Blanc et al., 2012; Gao et al., 2014; Pombert et al., 2014). The  
224 genome size of the total assembly in strain A99 was similar to that of strain NC64A (46.2Mb)  
225 (**Figure 4B**). By k-mer analysis (k-mer = 19), the genome size of A99 was estimated to be 61  
226 Mbp (Marcais and Kingsford, 2011). Its GC content of 68%, is the highest among the green  
227 algae species recorded (**Figure 4B**). In the A99 genome, 8298 gene models were predicted.  
228 As shown in **Figure 4C**, about 80% of these predicted genes have extensive sequence  
229 similarity to plant genes, while 13% so far have no similarity to genes of any other organisms  
230 (**Figure 4C**). It is also noteworthy that 7% of the A99 genes are similar to genes of other

231 kingdoms but not to *Hydra*, indicating the absence of gene transfer from *Hydra* to the  
232 photobiont genome (**Figure 4C**).

233

### 234 **The *Chlorella* A99 genome provides evidences for extensive nitrogenous amino acid** 235 **import and an incomplete nitrate assimilation pathway**

236

237 Several independent lines of evidence demonstrate that nitrogen limitation and amino-acid  
238 metabolism have a key role in the *Chlorella*–*Hydra* symbiosis and that symbiotic *Chlorella* A99  
239 depends on glutamine provided by its host (Rees, 1986; McAuley, 1987a, b, 1991; Rees, 1991)  
240 (Rees, 1989). To identify *Chlorella* candidate factors for the development and maintenance of  
241 the symbiotic life style, we therefore used the available genome information to assess genes  
242 potentially involved in amino acid transport and the nitrogen metabolic pathway.

243

244 When performing a search for the Pfam domain “Aa\_trans” or “AA\_permease” to find amino  
245 acid transporter genes in the A99 genome, we discovered numerous genes containing the  
246 Aa\_trans domain (**Supplementary Table 4A**). In particular, A99 contains many orthologous  
247 genes of amino acid permease 2 and of transmembrane amino acid transporter family protein  
248 (solute carrier family 38, sodium-coupled neutral amino acid transporter), as well as NC64A  
249 (**Supplementary Table 4B, C**). Both of these gene products are known to transport neutral  
250 amino acids including glutamine. This observation is supporting the view that import of amino  
251 acids is an essential feature for the symbiotic way of life of *Chlorella*.

252

253 In nitrogen assimilation processes, plants usually take up nitrogen in the form of nitrate ( $\text{NO}_3^-$ )  
254 via nitrate transporters (NRTs) or as ammonium ( $\text{NH}_4^+$ ) via ammonium transporters (AMT)  
255 (**Figure 5A**). In higher plants, two types of nitrate transporters, NRT1 and NRT2, have been  
256 identified (Krapp et al., 2014). Some NRT2 require nitrate assimilation-related component 2  
257 (NAR2) to be functional (Quesada et al., 1994).  $\text{NO}_3^-$  is reduced to nitrite by nitrate reductase  
258 (NR),  $\text{NO}_2^-$  is transported to the chloroplast by nitrate assimilation-related component1 (NAR1),  
259 and  $\text{NO}_2^-$  is reduced to  $\text{NH}_4^+$  by nitrite reductase (NiR).  $\text{NH}_4^+$  is incorporated into glutamine  
260 (Gln) by glutamine synthetase (GS), and Gln is incorporated into glutamate (Glu) by NADH-  
261 dependent glutamine amide-2-oxoglutarate aminotransferase (GOGAT), also known as  
262 glutamate synthase. This pathway is highly conserved among plants. In the genomes of 10  
263 green algae species sequenced so far, the major components of the pathway, including NRT1  
264 and NRT2, NAR1 and NAR2, NR, NiR, AMT, GOGAT and GS, are all present, although NRT1  
265 is absent in the *Micromonas pusilla* genome (Sanz-Luque et al., 2015).

266

267 Based on the annotation by Sanz-Luque et al. (Sanz-Luque et al., 2015), we searched these  
268 nitrogen assimilation genes in the *Chlorella* A99 genome, using ortholog grouping and a

269 reciprocal blast search using the protein sequences from other green algae (**Figure 5B**,  
270 **Supplementary Table 5**). As expected, the *Chlorella* A99 genome contains many homologues  
271 of the genes involved in nitrogen assimilation in plants including genes encoding NRT1, NAR1,  
272 NR, AMT, GS and GOGAT (**Figure 5B**). Intriguingly, our systematic searches have failed to  
273 identify representative genes for NRT2, NAR2 and NiR in the *Chlorella* A99 genome (**Figure**  
274 **5B**). We confirmed the absence of the NRT2 and NiR genes by PCR using primers designed  
275 for the conserved regions of these genes and which failed to produce a product with genomic  
276 DNA as a template (**Supplementary Figure 7**). Due to the weak sequence conservation of the  
277 NAR2 gene in the three algae genomes, PCR of that gene was not performed. Taken together,  
278 our observations indicate that *Chlorella* A99 algae appear to lack NRT2, NAR2 and NiR.

279  
280 Since in many fungi, cyanobacteria and algae species, nitrate assimilation genes are known  
281 to act in concert and a gene cluster of NR and NiR genes is conserved between different green  
282 algae (Sanz-Luque et al., 2015), we next investigated the level of genomic clustering of the  
283 nitrate assimilation pathway genes in the *Chlorella* genome. Comparing the genomes of  
284 NC64A and *Coccomyxa subellipsoidea* C169 (C169) revealed the presence of a cluster of NR  
285 and NiR genes (**Figure 5C**). In NC64A, two NRT2 genes, together with genes for NAR2, NR  
286 and NiR are clustered on scaffold 21. In C169, one of NR genes and NiR are clustered together  
287 but the second NR gene is separate. Interestingly, analyzing the sequences around the NR  
288 gene in the *Chlorella* A99 genome provided no evidence for the presence of a co-localized NiR  
289 gene or any other nitrate assimilation genes, nor any conserved gene synteny to NC64A and  
290 C169 (**Figure 5C**). Our comparative genomic analyses therefore points to an incomplete as  
291 well as scattered nitrogen metabolic pathway in symbiotic *Chlorella* A99, which lacks essential  
292 transporters and enzymes for nitrate assimilation and also lacks the clustered structure of  
293 nitrate assimilation genes.

294  
295 **Supplementing the medium with glutamine allows temporary *in vitro* growth of**  
296 **symbiotic *Chlorella* A99**

297  
298 The absence of genes essential for nitrate assimilation in the *Chlorella* A99 genome (**Figure**  
299 **5**) is consistent with its inability to grow outside the *Hydra* host cell (Habetha and Bosch, 2005)  
300 and indicates that *Chlorella* symbionts are dependent on metabolites provided by their host.  
301 We hypothesized that *Chlorella* is unable to use nitrite and ammonium as a nitrogen source,  
302 and that it relies on *Hydra* assimilating ammonium to glutamine to serve as the nitrogen source.  
303 To test this hypothesis and to examine utilization of nitrogen compounds of A99, we isolated  
304 *Chlorella* A99 from Hv\_Sym and cultivated it *in vitro* using modified bold basal medium (BBM)  
305 (Nichols and Bold, 1965) containing the same amount of nitrogen in the form of  $\text{NO}_3^-$ ,  $\text{NH}_4^+$ ,  
306 Gln or casamino acids (**Figure 6, Supplementary Table 6**). As controls, *Chlorella variabilis*



307 NC64A (NC64A) isolated from Hv\_NC64A and free-living C169 were used. To confirm that the  
308 cultured A99 is not contamination, we amplified and sequenced the genomic region of the 18S  
309 rRNA gene by PCR (**Supplementary Figure 8**) and checked this against the genomic  
310 sequence of A99. Kamako et al. reported that free-living algae *Chlorella vulgaris* Beijerinck var.  
311 *vulgaris* grow in media containing only inorganic nitrogen compounds as well as in media  
312 containing casamino acids as a nitrogen source, while NC64A required amino acids for growth  
313 (Kamako et al., 2005). Consistent with these observations, C169 grew in all tested media and  
314 NC64A grew in media containing casamino acids and Gln, although its growth rate was quite  
315 low in presence of  $\text{NH}_4^+$  and  $\text{NO}_3^-$  (**Figure 6**). Remarkably, *Chlorella* A99 increased in cell  
316 number for up to 8 days in media containing casamino acids and Gln (**Figure 6**). Similar to  
317 NC64A, A99 did not grow in presence of  $\text{NH}_4^+$  and  $\text{NO}_3^-$ . The growth rates of both A99 and  
318 NC64A were higher in medium containing a mixture of amino acids (casamino acids) than the  
319 single amino acid Gln. In contrast to NC64A, A99 could not be cultivated permanently in  
320 casamino acids or glutamine supplemented medium, indicating that additional growth factors  
321 are necessary to maintain *in vitro* growth of this obligate symbiont. Thus, although *in vitro*  
322 growth of A99 can be promoted by adding Glu and amino acids to the medium, A99 cannot be  
323 cultured permanently in this enriched medium, indicating that other host derived factors remain  
324 to be uncovered.

325

## 326 Discussion

327

328 Sequencing of the *Chlorella* A99 genome in combination with the transcriptome analyses of  
329 symbiotic, aposymbiotic and NC64A-infected *H. viridissima* polyps has enabled the  
330 identification of genes with specific functions in this symbiotic partnership. The *Hydra-Chlorella*  
331 symbiosis links carbohydrate supply from the photobiont to glutamine synthesis by the host.  
332 Characteristics of the symbiont genome obviously reflect its adaptation to this way of life,  
333 including an increase in amino acid transporters and degeneration of the nitrate assimilation  
334 pathway. This conclusion is based on six observations: (i) Expression of some genes including  
335 GS-1, Spot 14 and NaPi is specifically upregulated in the presence of *Chlorella* A99 (**Fig. 1C**,  
336 **Supplementary Table 1**), and (ii) they are induced by both, photosynthetic activity of *Chlorella*  
337 and by supplying exogenous maltose or glucose (**Figure 2, 3J, Supplementary Figure 6**).  
338 These results indicate that maltose release by photosynthesis of the symbiont enhances  
339 nutrition supply including glutamine by the host (**Figure 7**). (iii) Symbiotic *Chlorella* A99 cannot  
340 be cultivated *in vitro* in medium containing a single inorganic nitrogen source (**Figure 6**). Since  
341 medium containing glutamine supports *in vitro* growth of A99, this organism appears to depend  
342 on glutamine provided by the *Hydra* host. (iv) The genome of *Chlorella* A99 contains multiple  
343 amino acid transporter genes (**Supplementary Table 4**), but lacks genes involved in nitrate  
344 assimilation (**Figure 5**), pointing to amino acids as main source of nitrogen and a degenerated

345 nitrate assimilation pathway. As for ammonium, which is one of the main nitrogen sources in  
346 plants, previous studies have reported the inability of symbiotic algae to take up ammonium  
347 because of the low peri-algal pH (pH 4-5) that stimulates maltose release (Douglas and Smith,  
348 1984; Rees, 1989; McAuley, 1991; Dorling et al., 1997). Since *Chlorella* apparently cannot use  
349 nitrite and ammonium as a nitrogen source, it seems that *Hydra* has to assimilate ammonium  
350 to glutamine and provides it to *Chlorella* A99 (**Figure 7**).

351 **(v)** While polyps with native symbiont *Chlorella* A99 grew faster than aposymbiotic ones,  
352 symbiosis with foreign algae NC64A had no effect on the growth of polyps at all (**Figure 1B**).

353 **(vi)** *Hydra* endodermal epithelial cells host significantly fewer NC64A algae than A99  
354 (**Supplementary Figure 1**) providing additional support for the view of a tightly regulated  
355 codependent partnership in which exchange of nutrients appears to be the primary driving  
356 force.

357 Previous studies have reported that symbiotic *Chlorella* in green hydra releases significantly  
358 larger amounts of maltose than NC64A (Mews and Smith, 1982; Rees, 1989). In addition, Rees  
359 reported that *Hydra* polyps containing high maltose releasing algae had a high GS activity,  
360 whereas aposymbiotic *Hydra* or *Hydra* with a low maltose releasing algae had lower GS activity  
361 (Rees, 1986). Although the underlying mechanism of how maltose secretion and transportation  
362 from *Chlorella* is regulated is still unclear, the amount of maltose released by the symbiont  
363 could be an important symbiont-derived driver or stabilizer of the *Hydra–Chlorella* symbiosis.

364  
365 Exchange of nitrogenous compounds and photosynthetic products between host and symbiont  
366 is widely found in other symbiotic associations. For example, in marine invertebrates such as  
367 corals, sea anemones, and giant clams associated with *Symbiodinium* algae, the algae provide  
368 the photosynthate in forms of glucose, glycerol, organic acids, amino acids or lipids to their  
369 host, and in turn the symbionts receive ammonia or glutamine as nitrogen sources (Burriesci  
370 et al., 2012; Davy et al., 2012; Kellogg and Patton, 1983; Lewis and Smith, 1971; Muscatine,  
371 1965; Muscatine and Cernichiari, 1969; 1993; Trench, 1971; Venn et al., 2008; Whitehead and  
372 Douglas, 2003; Yellowlees et al., 2008). Moreover, in corals a Na/Pi transporter is involved in  
373 the uptake of phosphate across host membranes, and the zooxanthellae contribute to the  
374 uptake of phosphate (D'Elia, 1977; Jackson et al., 1989). These observations together with the  
375 results presented here make the host-controlled supply of nitrogen and phosphorus as a  
376 response of a signal photosynthate seem the universal principle of invertebrate-algae  
377 symbiosis.

378 Metabolic dependence of symbionts on host supply occasionally results in genome reduction  
379 and gene loss. For example, the symbiotic *Buchnera* bacteria of insects are missing particular  
380 genes in essential amino acid pathways (Shigenobu et al., 2000; Hansen et al., 2011). The fact  
381 that the corresponding genes of the host are upregulated in the bacteriocyte, indicates  
382 complementarity and syntrophy between host and symbiont. Similarly, in *Chlorella* A99 the

383 nitrogen assimilation system could have been lost as result of continuous supply of nitrogenous  
384 amino acids provided by *Hydra*. On the other hand, the genome size and total gene number  
385 of *Chlorella* A99 is similar to other species in the class Trebouxiophyceae (**Figure 4B**). The  
386 apparently unchanged complexity of the *Chlorella* A99 genome suggests a relatively early  
387 stage of this symbiotic partnership. From these observation, we propose that the gene loss in  
388 metabolic pathway is the first step of genome reduction caused by dependency on nutrients  
389 from the host. Our study suggests metabolic-codependency is the primary driving force for the  
390 evolution of symbiosis between *Hydra* and *Chlorella*.

391

## 392 **Materials and methods**

393

### 394 **Biological materials and procedures**

395 Experiments were carried out with the Australian *Hydra viridissima* strain A99, which was  
396 obtained from Dr. Richard Campbell, Irvine. Polyps were maintained at 18°C on a 12 hours  
397 light/dark cycle and fed with *Artemia* two or three times a week. Aposymbiotic (algae free)  
398 polyps were obtained by photobleaching using 5 µM DCMU (3-(3,4-dichlorophenyl)-1,1-  
399 dimethylurea) as described before (Pardy, 1976; Habetha et al., 2003). Experiments were  
400 carried out with polyps starved for 3-6 days. Isolation of endodermal layer and ectodermal layer  
401 was performed as described by Kishimoto et al. (Kishimoto et al., 1996). Symbiotic *Chlorella*  
402 were isolated as described before by Muscatine and McAuley (Muscatine, 1983; McAuley,  
403 1986b). *Chlorella variabilis* NC64A (NIES-2541), *Coccomyxa subellipsoidea* C-169 (NIES-  
404 2166) and *Chlamydomonas reinhardtii* (NIES-2235) were obtained from the Microbial Culture  
405 Collection at the National Institute for Environmental Studies (Tsukuba, Japan).

406

### 407 **Nucleic acid preparation**

408 Total RNA of *Hydra* was extracted by use of the Trizol reagent and PureLink RNA Mini Kit (Life  
409 Technology) after lysis and removal of algae by centrifugation. The genomic DNA of green  
410 algae was extracted using ISOPLANT II (Nippon Gene, Tokyo, Japan) following DNase I  
411 treatment to degrade contaminant DNA. Quantity and quality of DNA and RNA were checked by  
412 NanoDrop (Thermo Scientific Inc., Madison, USA) and BioAnalyzer (Agilent Technologies,  
413 Santa Clara, USA).

414

### 415 **Microarray Analysis**

416 cRNA targets labeled with cyanine-3 were synthesized from 400 ng total *Hydra* RNA using a  
417 Quick Amp Labeling Kit for one color detection (Agilent Technologies). A set of fluorescently  
418 labeled cRNA targets was employed in a hybridization reaction with 4 × 44K Custom-Made  
419 *Hydra viridissima* Microarray (Agilent Technologies) contributing a total of 43,222 transcripts  
420 that was built by mRNA-seq data (NCBI GEO Platform ID: GPL23280) (Bosch et al., 2009).



421 Hybridization and washing were performed using the GE Hybridization Kit and GE Wash Pack  
422 (Agilent Technologies) after which the arrays were scanned on an Agilent Technologies  
423 G2565BA microarray scanner system with SureScan technology following protocols according  
424 to the manufacturer's instructions. The intensity of probes was extracted from scanned  
425 microarray images using Feature Extraction 10.7 software (Agilent Technologies). All  
426 algorithms and parameters used in this analysis were used with default conditions.  
427 Background-subtracted signal-intensity values (gProcessedSignal) generated by the Feature  
428 Extraction software were normalized using the 75<sup>th</sup> percentile signal intensity among the  
429 microarray. Those genes differentially expressed between two samples were determined by  
430 average of fold change (cut off >2.0) and Student's t-test ( $P < 0.1$ ). The data series are  
431 accessible at NCBI GEO under accession number GSE97633.

432

### 433 **Quantitative real time RT-PCR**

434 Total RNA was reverse transcribed using First Strand cDNA Synthesis Kit (Fermentas, Ontario,  
435 Canada). Real-time PCR was performed using GoTaq qPCR Master Mix (Promega, Madison,  
436 USA) and ABI Prism 7,300 (Applied Biosystems, Foster City, USA). All qPCR experiments  
437 were performed in duplicate with three biological replicates each. Values were normalized  
438 using the expression of the tubulin alpha gene. Primers used for these experiments are listed  
439 in **Supplementary Table 7A**.

440

### 441 **Whole mount *in situ* hybridization**

442 Expression patterns of specific *Hydra* genes were detected by whole mount *in situ*  
443 hybridization with digoxigenin (DIG)-labelled RNA probes. Specimens were fixed in 4%  
444 paraformaldehyde. Hybridization signal was visualized using anti-DIG antibodies conjugated  
445 to alkaline phosphatase and NBT/BCIP staining solution (Roche). DIG-labeled sense probes  
446 (targeting the same sequences as the antisense probes) were used as a control. Primers used  
447 for these experiments are listed in **Supplementary Table 7B**.

448

### 449 **Genome sequencing and gene prediction**

450 For genome sequencing of *Chlorella* sp. A99, *Chlorella* sp. A99 was isolated from *H. viridissima*  
451 A99 and genomic DNA was extracted. Paired-end library (insert size: 740 bp) and mate-pair  
452 libraries (insert size: 2.2 and 15.2kb) were made using Illumina TruSeq DNA LT Sample Prep Kit  
453 and Nextera Mate Pair Sample Preparation Kit respectively (Illumina Inc., San Diego, USA),  
454 following the manufacturer's protocols. Genome sequencing was performed using Illumina Miseq  
455 and Hiseq 2000 platforms. Sequence reads were assembled using Newbler Assembler version  
456 2.8 (Roche, Penzberg, Germany) and subsequent scaffolding was performed by SSPACE  
457 (Boetzer et al., 2011). Gaps inside the scaffolds were closed with the paired-end and mate-  
458 pair data using GapCloser of Short Oligonucleotide Analysis Package (Luo et al., 2012). To

459 overcome potential assembly errors arising from tandem repeats, sequences that aligned to  
460 another sequence by more than 50% of the length using blastn (1e-50) were removed from  
461 the assembly. The completeness of the genome was evaluated using CEGMA v2.4 (Core  
462 Eukaryotic Genes Mapping Approach) based on mapping of the 248 most highly conserved  
463 core eukaryotic genes (CEGs) on the assembled genome (Parra et al., 2007). The  
464 completeness of complete and partial CEGs in the A99 scaffolds was 80% and 88%,  
465 respectively. The fraction of repetitive sequences was 12%. Gene models was predicted by  
466 AUGUSTUS 3.0.1 using model parameters for NC64A (Stanke et al., 2006). This Whole  
467 Genome Shotgun project has been deposited at DDBJ/ENA/GenBank under the accession  
468 PCFQ00000000 (BioProject ID: PRJNA412448). The genome sequences and gene models  
469 are also accessible at website of OIST Marine Genomics Unit Genome Project  
470 ([http://marinegenomics.oist.jp/chlorellaA99/viewer/info?project\\_id=65](http://marinegenomics.oist.jp/chlorellaA99/viewer/info?project_id=65)).

471

### 472 **Analysis of genes in *Hydra viridissima* and *Chlorella***

473 Annotation of transcriptome contigs and prediction of gene models was performed by use of  
474 BLAST, Gene Ontology (The Gene Ontology et al., 2000) and blast2go (Conesa et al., 2005).  
475 To examine the conservation of *H. viridissima* contigs among metazoans, homology searches  
476 by blastx (evaluate 1E-5) were performed using protein databases obtained from NCBI for  
477 *Drosophila melanogaster* and *Homo sapiens*, from the JGI genome portal  
478 (<http://genome.jgi.doe.gov/>) for *Branchiostoma floridae*, *Nematostella vectensis*, from  
479 Echinobase (<http://www.echinobase.org/EchinoBase/>) for *Strongylocentrotus pupuratus*, from  
480 Compagen for *Hydra magnipapillata*, and from the OIST marine genomics Genome browser  
481 ver.1.1 ([http://marinegenomics.oist.jp/coral/viewer/info?project\\_id=3](http://marinegenomics.oist.jp/coral/viewer/info?project_id=3)) for *Acropora digitifera*.

482

483 For comparative analysis of gene models of *Chlorella* sp. A99 and other algae, domain  
484 searches against the Pfam database (Pfam-A.hmm) were performed using HMMER (Eddy,  
485 1998; Finn et al., 2016), and ortholog gene grouping was done using OrthoFinder (Emms and  
486 Kelly, 2015). The sequences of the reference genes and genomes were obtained from the  
487 database of the JGI genome portal for *Chlorella variabilis* NC64A, *Coccomyxa subellipsoidea*  
488 C-169, *Volvox carteri*, *Micromonas pusilla*, and *Ostreococcus tauri*, from NCBI for  
489 *Auxenochlorella protothecoides* 0710 and from Phytozome  
490 (<http://phytozome.jgi.doe.gov/pz/portal.html>) for *Chlamydomonas reinhardtii* (Merchant et al.,  
491 2007; Worden et al., 2009; Blanc et al., 2010; Prochnik et al., 2010; Blanc et al., 2012; Gao et  
492 al., 2014; Pombert et al., 2014)

493

494 Nitrogen assimilation genes in *Chlorella* A99 were identified by orthologous gene groups and  
495 reciprocal blast searches. The number of genes for nitrate assimilation genes, glutamine  
496 synthetase and glutamate synthetase, and clustering of such genes were systematically

497 reported by (Sanz-Luque et al., 2015). We used these data as reference for searches of  
498 nitrogen assimilation genes, and further nitrogen assimilation genes were searched by Kyoto  
499 Encyclopedia of Genes and Genomes (KEGG) pathway (Kanehisa and Goto, 2000). JGI  
500 genome browsers of *Chlorella variabilis* NC64A and *Coccomyxa subellipsoidea* C-169 were  
501 also used for retrieving genes and checking gene order on the scaffolds.

502

### 503 **Phylogenetic analysis**

504 For a phylogenetic tree of chlorophyte green algae, the sequences of 18S rRNA gene, ITS1,  
505 5.8S rRNA gene, ITS2 and 28S rRNA gene were obtained from scaffold20 of *Chlorella* A99  
506 genome sequence, and from NCBI nucleotide database entries for *Chlorella variabilis* NC64A  
507 (FM205849.1), *Auxenochlorella protothecoides* 0710 (NW\_011934479.1), *Coccomyxa*  
508 *subellipsoidea* C169 (AGSI01000011.1), *Volvox carteri* f. nagariensis (NW\_003307662.1),  
509 *Chlamydomonas reinhardtii* (FR865576.1), *Ostreococcus tauri* (GQ426340.1) and  
510 *Micromonas pusilla* (FN562452.1). Multiple alignments were produced with CLUSTALX (2.1)  
511 with gap trimming (Larkin et al., 2007). Sequences of poor quality that did not well align were  
512 deleted using BioEdit (Hall, 1999). Phylogenetic analyses were performed using the Neighbor-  
513 Joining method by CLUSTALX. Representative phylogenetic trees were drawn by using NJ  
514 plot (Perriere and Gouy, 1996).

515

### 516 **PCR amplification of nitrate assimilation genes in green algae**

517 Primers were designed based on the conserved region of the NRT2 gene, NiR and NR genes  
518 (positive control) identified by comparison of genes from *Chlorella variabilis* NC64A (NC64A),  
519 *Coccomyxa subellipsoidea* C169 (C169), and *Chlamydomonas reinhardtii* (Cr) which belongs  
520 to Chlorophyceae class of green algae. Primers for NAR2 could not be designed because of  
521 insufficient conservation. As positive controls, amplicons were produced for NR of all the green  
522 algae examined and of NRT2 and NiR from NC64A, C169 and Cr, after which their sequences  
523 were checked. KOD FX Neo (TOYOBO, Tokyo, Japan) was used under the following  
524 conditions: an initial denaturation phase (94 °C for 120 sec) followed by 36 cycles of (98 °C for  
525 30 sec, 69 °C for 100 sec) for NiR, (98 °C for 30 sec, 58 °C for 30 sec and 68 °C for 210 sec)  
526 for NRT2 and (98 °C for 30 sec, 59 °C for 30 sec and 68 °C for 60 sec) for NR. In each case,  
527 10 ng gDNA was used as a template. The primers used are described in **Supplementary Table**  
528 **7C**. PCR products were sequenced to confirm amplification of the target genes using ABI  
529 PRISM 3100 Genetic Analyzer (Thermo Fisher Scientific Inc., Madison, USA) using BigDye  
530 Terminator v3.1 Cycle Sequencing Kit (Thermo Fisher Scientific).

531

### 532 **In vitro culture of algae**

533 To isolate symbiotic algae, polyps were quickly homogenized in 0.25% sodium dodecyl sulfate  
534 (SDS) solution and centrifuged at 3000g for 1 min. The pellet was resuspended in 0.05% SDS

535 and centrifuged at 500g for 5min. Isolated A99, NC64A and C169 were washed by sterilized  
536 Bold Basal Medium (Bischoff and Bold, 1963) modified by the addition of 0.5% glucose,  
537 1.2mg/L vitamine B1 (Thiaminhydrochloride), 0.01mg/L vitamine B12 (Cyanocobalamin)  
538 (**Supplementary Table 6**) and incubated for two days in modified Bold Basal Medium with  
539 50mg/l ampicillin and streptomycin. The algae were cultivated in 5 ml of modified Bold Basal  
540 Medium (BBM) with the same amount of nitrogen (2.9 mM NaNO<sub>3</sub>, NH<sub>4</sub>Cl, glutamine or 426  
541 mg/l casamino acids) and 5mg/l Carbendazim (anti-fungal) with fluorescent illumination (12  
542 hour light, 12 hour dark) at 20°C. Mean numbers of algae per ml were calculated from three  
543 tubes enumerated at 4, 8, and 12 days after inoculation with 10<sup>6</sup> cell/sml using a  
544 hemocytometer. After cultivation, gDNA was isolated from the A99 cultured in Gln-containing  
545 BBM and casamino acid-containing BBM and A99 was isolated from green hydra directly. A  
546 partial genomic region of the 18S rRNA gene was amplified by PCR and sequenced to confirm  
547 absence of contamination by other algae. PCR was performed using AmpliTaq Gold (Thermo  
548 Fisher Scientific). Sequencing was performed as described above. The primers used are  
549 described in **Supplementary Table 7D**.

550

551

## 552 **Acknowledgement**

553 We thank Trudy Wassenaar for critical reading the text and for discussion. We also thank the  
554 DNA Sequencing Section in OIST for genome sequencing. This work was supported in part by  
555 JSPS KAKENHI Grant-in-Aid for Young Scientists (B) 25840132 and Scientific Research (C)  
556 15K07173 to M.H. and by the Deutsche Forschungsgemeinschaft (DFG) (CRC1182 “Origin  
557 and Function of Metaorganisms”). T.C.G.B. gratefully appreciates support from the Canadian  
558 Institute for Advanced Research (CIFAR).

559

## 560 **Competing interests**

561 The authors declare that no competing interests exist.

562

563

## 564 **References**

565

566 Baumgarten, S., Simakov, O., Esherick, L.Y., Liew, Y.J., Lehnert, E.M., Michell, C.T., Li, Y.,  
567 Hambleton, E.A., Guse, A., Oates, M.E., Gough, J., Weis, V.M., Aranda, M., Pringle, J.R., Voolstra,  
568 C.R., 2015. The genome of *Aiptasia*, a sea anemone model for coral symbiosis. *Proceedings of the*  
569 *National Academy of Sciences* 112, 11893-11898. 10.1073/pnas.1513318112

570 Bischoff, H.W., Bold, H.C., 1963. Some soil algae from enchanted rock and related Algal species.  
571 [s.n.], Austin.

572 Blanc, G., Agarkova, I., Grimwood, J., Kuo, A., Brueggeman, A., Dunigan, D.D., Gurnon, J.,

- 573 Ladunga, I., Lindquist, E., Lucas, S., Pangilinan, J., Proschold, T., Salamov, A., Schmutz, J., Weeks,  
574 D., Yamada, T., Lomsadze, A., Borodovsky, M., Claverie, J.M., Grigoriev, I.V., Van Etten, J.L., 2012.  
575 The genome of the polar eukaryotic microalga *Coccomyxa subellipsoidea* reveals traits of cold  
576 adaptation. *Genome Biol.* 13, R39. 10.1186/gb-2012-13-5-r39
- 577 Blanc, G., Duncan, G., Agarkova, I., Borodovsky, M., Gurnon, J., Kuo, A., Lindquist, E., Lucas, S.,  
578 Pangilinan, J., Polle, J., Salamov, A., Terry, A., Yamada, T., Dunigan, D.D., Grigoriev, I.V., Claverie,  
579 J.M., Van Etten, J.L., 2010. The *Chlorella variabilis* NC64A genome reveals adaptation to  
580 photosymbiosis, coevolution with viruses, and cryptic sex. *Plant Cell* 22, 2943-2955.  
581 10.1105/tpc.110.076406
- 582 Boetzer, M., Henkel, C.V., Jansen, H.J., Butler, D., Pirovano, W., 2011. Scaffolding pre-assembled  
583 contigs using SSPACE. *Bioinformatics* 27, 578-579. 10.1093/bioinformatics/btq683
- 584 Bosch, T.C., Augustin, R., Anton-Erxleben, F., Fraune, S., Hemmrich, G., Zill, H., Rosenstiel, P.,  
585 Jacobs, G., Schreiber, S., Leippe, M., Stanisak, M., Grotzinger, J., Jung, S., Podschun, R., Bartels,  
586 J., Harder, J., Schroder, J.M., 2009. Uncovering the evolutionary history of innate immunity: the  
587 simple metazoan *Hydra* uses epithelial cells for host defence. *Dev. Comp. Immunol.* 33, 559-569.  
588 10.1016/j.dci.2008.10.004
- 589 Bossert, P., Dunn, K.W., 1986. Regulation of intracellular algae by various strains of the symbiotic  
590 *Hydra viridissima*. *J. Cell Sci.* 85, 187-195
- 591 Brown, S.B., Maloney, M., Kinlaw, W.B., 1997. "Spot 14" protein functions at the pretranslational  
592 level in the regulation of hepatic metabolism by thyroid hormone and glucose. *J. Biol. Chem.* 272,  
593 2163-2166
- 594 Campbell, R.D., 1990. Transmission of symbiotic algae through sexual reproduction in *hydra*:  
595 movement of algae into the oocyte. *Tissue Cell* 22, 137-147
- 596 Cernichiari, E., Muscatine, L., Smith, D.C., 1969. Maltose Excretion by the Symbiotic Algae of  
597 *Hydra viridis*. *Proc. R. Soc. Lond., Ser. B: Biol. Sci.* 173, 557-576. 10.1098/rspb.1969.0077
- 598 Conesa, A., Gotz, S., Garcia-Gomez, J.M., Terol, J., Talon, M., Robles, M., 2005. Blast2GO: a  
599 universal tool for annotation, visualization and analysis in functional genomics research.  
600 *Bioinformatics* 21, 3674-3676. 10.1093/bioinformatics/bti610
- 601 Cook, C.B., Kelty, M.O., 1982. Glycogen, protein, and lipid content of green, aposymbiotic, and  
602 nonsymbiotic *hydra* during starvation. *J. Exp. Zool.* 222, 1-9. 10.1002/jez.1402220102
- 603 Davy, S.K., Allemand, D., Weis, V.M., 2012a. Cell Biology of Cnidarian-Dinoflagellate Symbiosis.  
604 *Microbiology and Molecular Biology Reviews* : MMBR 76, 229-261. 10.1128/MMBR.05014-11
- 605 Davy, S.K., Allemand, D., Weis, V.M., 2012b. Cell biology of cnidarian-dinoflagellate symbiosis.  
606 *Microbiol. Mol. Biol. Rev.* 76, 229-261. 10.1128/MMBR.05014-11
- 607 Dorling, M., McAuley, P.J., Hodge, H., 1997. Effect of pH on growth and carbon metabolism of  
608 maltose-releasing *Chlorella* (Chlorophyta). *Eur. J. Phycol.* 32, 19-24.  
609 10.1080/09541449710001719335
- 610 Douglas, A., Smith, D.C., 1984. The Green *Hydra* Symbiosis. VIII. Mechanisms in Symbiont



- 611 Regulation. Proceedings of the Royal Society of London. Series B. Biological Sciences 221, 291-319.  
612 10.1098/rspb.1984.0035
- 613 Douglas, A.E., 1994. Symbiotic interactions / by A.E. Douglas. Oxford University Press, Oxford ;  
614 New York.
- 615 Douglas, A.E., Smith, D.C., 1983. The cost of symbionts to the host in the green hydra symbiosis.  
616 W. DeGriyter and Co. Berlin.
- 617 Eddy, S.R., 1998. Profile hidden Markov models. *Bioinformatics* 14, 755-763
- 618 Emms, D.M., Kelly, S., 2015. OrthoFinder: solving fundamental biases in whole genome  
619 comparisons dramatically improves orthogroup inference accuracy. *Genome Biol.* 16, 157.  
620 10.1186/s13059-015-0721-2
- 621 Finn, R.D., Coghill, P., Eberhardt, R.Y., Eddy, S.R., Mistry, J., Mitchell, A.L., Potter, S.C., Punta,  
622 M., Qureshi, M., Sangrador-Vegas, A., Salazar, G.A., Tate, J., Bateman, A., 2016. The Pfam protein  
623 families database: towards a more sustainable future. *Nucleic Acids Res.* 44, D279-285.  
624 10.1093/nar/gkv1344
- 625 Gao, C., Wang, Y., Shen, Y., Yan, D., He, X., Dai, J., Wu, Q., 2014. Oil accumulation mechanisms of  
626 the oleaginous microalga *Chlorella protothecoides* revealed through its genome, transcriptomes,  
627 and proteomes. *BMC Genomics* 15, 582. 10.1186/1471-2164-15-582
- 628 Habetha, M., Anton-Erxleben, F., Neumann, K., Bosch, T.C., 2003. The *Hydra viridis*/*Chlorella*  
629 symbiosis. Growth and sexual differentiation in polyps without symbionts. *Zoology* 106, 101-108.  
630 10.1078/0944-2006-00104
- 631 Habetha, M., Bosch, T.C., 2005. Symbiotic *Hydra* express a plant-like peroxidase gene during  
632 oogenesis. *J. Exp. Biol.* 208, 2157-2165. 10.1242/jeb.01571
- 633 Hall, 1999. BioEdit: a user-friendly biological sequence alignment editor and analysis program for  
634 Windows 95/98/NT. *Nucleic Acid Symposium Series* 41, 95-98
- 635 Huss, V.A.R., Holweg, C., Seidel, B., Reich, V., Rahat, M., Kessler, E., 1993/1994. There is an  
636 ecological basis for host/symbiont specificity in *Chlorella*/*Hydra* symbioses. *Endocytobiosis and Cell*  
637 *Research* 10, 35-46
- 638 Ishikawa, M., Yuyama, I., Shimizu, H., Nozawa, M., Ikeo, K., Gojobori, T., 2016. Different  
639 Endosymbiotic Interactions in Two *Hydra* Species Reflect the Evolutionary History of  
640 Endosymbiosis. *Genome Biol. Evol.* 8, 2155-2163. 10.1093/gbe/evw142
- 641 Joy, J.B., 2013. Symbiosis catalyses niche expansion and diversification. *Proceedings of the Royal*  
642 *Society B: Biological Sciences* 280. 10.1098/rspb.2012.2820
- 643 Kamako, S.-i., Hoshina, R., Ueno, S., Imamura, N., 2005. Establishment of axenic endosymbiotic  
644 strains of Japanese *Paramecium bursaria* and the utilization of carbohydrate and nitrogen  
645 compounds by the isolated algae. *Eur. J. Protistol.* 41, 193-202. 10.1016/j.ejop.2005.04.001
- 646 Kanehisa, M., Goto, S., 2000. KEGG: kyoto encyclopedia of genes and genomes. *Nucleic Acids Res.*  
647 28, 27-30
- 648 Karakashian, S.J., Karakashian, M.W., 1965. Evolution and Symbiosis in the Genus *Chlorella* and

- 649 Related Algae. *Evolution* 19, 368-377
- 650 Kawaida, H., Ohba, K., Koutake, Y., Shimizu, H., Tachida, H., Kobayakawa, Y., 2013. Symbiosis  
651 between hydra and chlorella: molecular phylogenetic analysis and experimental study provide  
652 insight into its origin and evolution. *Mol. Phylogenet. Evol.* 66, 906-914.  
653 10.1016/j.ympev.2012.11.018
- 654 Khalturin, K., Hemmrich, G., Fraune, S., Augustin, R., Bosch, T.C., 2009. More than just orphans:  
655 are taxonomically-restricted genes important in evolution? *Trends Genet.* 25, 404-413.  
656 10.1016/j.tig.2009.07.006
- 657 Kishimoto, Y., Murate, M., Sugiyama, T., 1996. Hydra regeneration from recombined ectodermal  
658 and endodermal tissue. I. Epibolic ectodermal spreading is driven by cell intercalation. *J. Cell Sci.*  
659 109, 763-772
- 660 Krapp, A., David, L.C., Chardin, C., Girin, T., Marmagne, A., Leprince, A.-S., Chaillou, S., Ferrario-  
661 Méry, S., Meyer, C., Daniel-Vedele, F., 2014. Nitrate transport and signalling in Arabidopsis. *J. Exp.*  
662 *Bot.* 65, 789-798. 10.1093/jxb/eru001
- 663 Larkin, M.A., Blackshields, G., Brown, N.P., Chenna, R., McGettigan, P.A., McWilliam, H., Valentin,  
664 F., Wallace, I.M., Wilm, A., Lopez, R., Thompson, J.D., Gibson, T.J., Higgins, D.G., 2007. Clustal W  
665 and Clustal X version 2.0. *Bioinformatics* 23, 2947-2948. 10.1093/bioinformatics/btm404
- 666 Lehnert, E.M., Mouchka, M.E., Burriesci, M.S., Gallo, N.D., Schwarz, J.A., Pringle, J.R., 2014.  
667 Extensive Differences in Gene Expression Between Symbiotic and Aposymbiotic Cnidarians. *G3:*  
668 *Genes|Genomes|Genetics* 4, 277-295. 10.1534/g3.113.009084
- 669 Liaw, S.-H., Kuo, I., Eisenberg, D., 1995. Discovery of the ammonium substrate site on glutamine  
670 synthetase, A third cation binding site. *Protein Sci.* 4, 2358-2365. 10.1002/pro.5560041114
- 671 Luo, R., Liu, B., Xie, Y., Li, Z., Huang, W., Yuan, J., He, G., Chen, Y., Pan, Q., Liu, Y., Tang, J., Wu,  
672 G., Zhang, H., Shi, Y., Liu, Y., Yu, C., Wang, B., Lu, Y., Han, C., Cheung, D.W., Yiu, S.M., Peng, S.,  
673 Xiaoqian, Z., Liu, G., Liao, X., Li, Y., Yang, H., Wang, J., Lam, T.W., Wang, J., 2012. SOAPdenovo2:  
674 an empirically improved memory-efficient short-read de novo assembler. *Gigascience* 1, 18.  
675 10.1186/2047-217X-1-18
- 676 Marcais, G., Kingsford, C., 2011. A fast, lock-free approach for efficient parallel counting of  
677 occurrences of k-mers. *Bioinformatics* 27, 764-770. 10.1093/bioinformatics/btr011
- 678 Martinez, D.E., Iniguez, A.R., Percell, K.M., Willner, J.B., Signorovitch, J., Campbell, R.D., 2010.  
679 Phylogeny and biogeography of Hydra (Cnidaria: Hydridae) using mitochondrial and nuclear DNA  
680 sequences. *Mol. Phylogenet. Evol.* 57, 403-410. 10.1016/j.ympev.2010.06.016
- 681 McAuley, P.J., 1986a. The cell cycle of symbiotic Chlorella. III. Numbers of algae in green hydra  
682 digestive cells are regulated at digestive cell division. *J. Cell Sci.* 85, 63-71
- 683 McAuley, P.J., 1986b. Isolation of viable uncontaminated Chlorella from green hydra. *Limnol.*  
684 *Oceanogr.* 31, 222-224. 10.4319/lo.1986.31.1.0222
- 685 McAuley, P.J., 1987a. Nitrogen limitation and amino-acid metabolism of Chlorella symbiotic with  
686 green hydra. *Planta* 171, 532-538. 10.1007/bf00392303

- 687 McAuley, P.J., 1987b. Quantitative Estimation of Movement of an Amino Acid from Host to  
688 *Chlorella* Symbionts in Green Hydra. *Biol. Bull.* 173, 504-512. 10.2307/1541696
- 689 McAuley, P.J., 1991. Amino acids as a nitrogen source for *Chlorella* symbiotic with green hydra, in:  
690 Williams, R.B., Cornelius, P.F.S., Hughes, R.G., Robson, E.A. (Eds.), *Coelenterate Biology: Recent*  
691 *Research on Cnidaria and Ctenophora: Proceedings of the Fifth International Conference on*  
692 *Coelenterate Biology*, 1989. Springer Netherlands, Dordrecht, pp. 369-376. 10.1007/978-94-011-  
693 3240-4\_53
- 694 McAuley, P.J., Smith, D.C., 1982. The Green Hydra Symbiosis. V. Stages in the Intracellular  
695 Recognition of Algal Symbionts by Digestive Cells. *Proc. R. Soc. Lond., Ser. B: Biol. Sci.* 216, 7-23
- 696 McFall-Ngai, M., Hadfield, M.G., Bosch, T.C.G., Carey, H.V., Domazet-Lošo, T., Douglas, A.E.,  
697 Dubilier, N., Eberl, G., Fukami, T., Gilbert, S.F., Hentschel, U., King, N., Kjelleberg, S., Knoll, A.H.,  
698 Kremer, N., Mazmanian, S.K., Metcalf, J.L., Neelson, K., Pierce, N.E., Rawls, J.F., Reid, A., Ruby,  
699 E.G., Rumpho, M., Sanders, J.G., Tautz, D., Wernegreen, J.J., 2013. Animals in a bacterial world,  
700 a new imperative for the life sciences. *Proceedings of the National Academy of Sciences* 110, 3229-  
701 3236. 10.1073/pnas.1218525110
- 702 Merchant, S.S., Prochnik, S.E., Vallon, O., Harris, E.H., Karpowicz, S.J., Witman, G.B., Terry, A.,  
703 Salamov, A., Fritz-Laylin, L.K., Marechal-Drouard, L., Marshall, W.F., Qu, L.H., Nelson, D.R.,  
704 Sanderfoot, A.A., Spalding, M.H., Kapitonov, V.V., Ren, Q., Ferris, P., Lindquist, E., Shapiro, H.,  
705 Lucas, S.M., Grimwood, J., Schmutz, J., Cardol, P., Cerutti, H., Chanfreau, G., Chen, C.L., Cognat,  
706 V., Croft, M.T., Dent, R., Dutcher, S., Fernandez, E., Fukuzawa, H., Gonzalez-Ballester, D.,  
707 Gonzalez-Halphen, D., Hallmann, A., Hanikenne, M., Hippler, M., Inwood, W., Jabbari, K., Kalanon,  
708 M., Kuras, R., Lefebvre, P.A., Lemaire, S.D., Lobanov, A.V., Lohr, M., Manuell, A., Meier, I., Mets,  
709 L., Mittag, M., Mittelmeier, T., Moroney, J.V., Moseley, J., Napoli, C., Nedelcu, A.M., Niyogi, K.,  
710 Novoselov, S.V., Paulsen, I.T., Pazour, G., Purton, S., Ral, J.P., Riano-Pachon, D.M., Riekhof, W.,  
711 Rymarquis, L., Schroda, M., Stern, D., Umen, J., Willows, R., Wilson, N., Zimmer, S.L., Allmer, J.,  
712 Balk, J., Bisova, K., Chen, C.J., Elias, M., Gendler, K., Hauser, C., Lamb, M.R., Ledford, H., Long,  
713 J.C., Minagawa, J., Page, M.D., Pan, J., Pootakham, W., Roje, S., Rose, A., Stahlberg, E., Terauchi,  
714 A.M., Yang, P., Ball, S., Bowler, C., Dieckmann, C.L., Gladyshev, V.N., Green, P., Jorgensen, R.,  
715 Mayfield, S., Mueller-Roeber, B., Rajamani, S., Sayre, R.T., Brokstein, P., Dubchak, I., Goodstein,  
716 D., Hornick, L., Huang, Y.W., Jhaveri, J., Luo, Y., Martinez, D., Ngau, W.C., Otiillar, B., Poliakov, A.,  
717 Porter, A., Szajkowski, L., Werner, G., Zhou, K., Grigoriev, I.V., Rokhsar, D.S., Grossman, A.R., 2007.  
718 The *Chlamydomonas* genome reveals the evolution of key animal and plant functions. *Science* 318,  
719 245-250. 10.1126/science.1143609
- 720 Mews, L.K., 1980. The Green Hydra Symbiosis. III. The Biotrophic transport of Carbohydrate from  
721 Alga to Animal. *Proc. R. Soc. Lond., Ser. B: Biol. Sci.* 209, 377-401. 10.1098/rspb.1980.0101
- 722 Mews, L.K., Smith, D.C., 1982. The Green Hydra Symbiosis. VI. What is the Role of Maltose  
723 Transfer from Alga to Animal? *Proceedings of the Royal Society of London. Series B. Biological*  
724 *Sciences* 216, 397-413. 10.1098/rspb.1982.0083



- 725 Moran, N.A., 2007. Symbiosis as an adaptive process and source of phenotypic complexity. Proc.  
726 Natl. Acad. Sci. U. S. A. 104, 8627-8633. 10.1073/pnas.0611659104
- 727 Murer, H., Biber, J., 1996. Molecular mechanisms of renal apical Na/phosphate cotransport. Annu.  
728 Rev. Physiol. 58, 607-618. 10.1146/annurev.ph.58.030196.003135
- 729 Muscatine, L., 1965. Symbiosis of hydra and algae. 3. Extracellular products of the algae. Comp.  
730 Biochem. Physiol. 16, 77-92
- 731 Muscatine, L., 1983. Hydra: Research Methods. Plenum Press, New York.
- 732 Muscatine, L., Lenhoff, H.M., 1963. Symbiosis: On the Role of Algae Symbiotic with Hydra. Science  
733 142, 956-958. 10.1126/science.142.3594.956
- 734 Muscatine, L., Lenhoff, H.M., 1965a. Symbiosis of Hydra and Algae. I. Effects of Some  
735 Environmental Cations on Growth of Symbiotic and Aposymbiotic Hydra. Biol. Bull. 128, 415-424.  
736 10.2307/1539903
- 737 Muscatine, L., Lenhoff, H.M., 1965b. Symbiosis of Hydra and Algae. II. Effects of Limited Food and  
738 Starvation on Growth of Symbiotic and Aposymbiotic Hydra. Biol. Bull. 129, 316-328
- 739 Muscatine, L., McAuley, P.J., 1982. Transmission of symbiotic algae to eggs of green hydra. Cytobios  
740 33, 111-124
- 741 Nichols, H.W., Bold, H.C., 1965. Trichosacinapolyomorpha Gen. et sp. NOV. Journal of Phycology 1,  
742 34-38
- 743 Palenik, B., Grimwood, J., Aerts, A., Rouze, P., Salamov, A., Putnam, N., Dupont, C., Jorgensen, R.,  
744 Derelle, E., Rombauts, S., Zhou, K., Otiillar, R., Merchant, S.S., Podell, S., Gaasterland, T., Napoli,  
745 C., Gendler, K., Manuell, A., Tai, V., Vallon, O., Piganeau, G., Jancek, S., Heijde, M., Jabbari, K.,  
746 Bowler, C., Lohr, M., Robbens, S., Werner, G., Dubchak, I., Pazour, G.J., Ren, Q., Paulsen, I.,  
747 Delwiche, C., Schmutz, J., Rokhsar, D., Van de Peer, Y., Moreau, H., Grigoriev, I.V., 2007. The tiny  
748 eukaryote *Ostreococcus* provides genomic insights into the paradox of plankton speciation. Proc.  
749 Natl. Acad. Sci. U. S. A. 104, 7705-7710. 10.1073/pnas.0611046104
- 750 Pardy, R.L., 1976. The morphology of green hydra endosymbionts as influenced by host strain and  
751 host environment. J. Cell Sci. 20
- 752 Parra, G., Bradnam, K., Korf, I., 2007. CEGMA: a pipeline to accurately annotate core genes in  
753 eukaryotic genomes. Bioinformatics 23. 10.1093/bioinformatics/btm071
- 754 Perriere, G., Gouy, M., 1996. WWW-query: an on-line retrieval system for biological sequence banks.  
755 Biochimie 78, 364-369
- 756 Pombert, J.F., Blouin, N.A., Lane, C., Boucias, D., Keeling, P.J., 2014. A lack of parasitic reduction  
757 in the obligate parasitic green alga *Helicosporidium*. PLoS Genet. 10, e1004355.  
758 10.1371/journal.pgen.1004355
- 759 Prochnik, S.E., Umen, J., Nedelcu, A.M., Hallmann, A., Miller, S.M., Nishii, I., Ferris, P., Kuo, A.,  
760 Mitros, T., Fritz-Laylin, L.K., Hellsten, U., Chapman, J., Simakov, O., Rensing, S.A., Terry, A.,  
761 Pangilinan, J., Kapitonov, V., Jurka, J., Salamov, A., Shapiro, H., Schmutz, J., Grimwood, J.,  
762 Lindquist, E., Lucas, S., Grigoriev, I.V., Schmitt, R., Kirk, D., Rokhsar, D.S., 2010. Genomic analysis

- 763 of organismal complexity in the multicellular green alga *Volvox carteri*. *Science* 329, 223-226.  
764 [10.1126/science.1188800](https://doi.org/10.1126/science.1188800)
- 765 Quesada, A., Galvan, A., Fernandez, E., 1994. Identification of nitrate transporter genes in  
766 *Chlamydomonas reinhardtii*. *Plant J.* 5, 407-419
- 767 Rahat, M., Reich, V., 1984. Intracellular infection of aposymbiotic *Hydra viridis* by a foreign free-  
768 living *Chlorella* sp.: initiation of a stable symbiosis. *J. Cell Sci.* 65, 265-277
- 769 Rees, T.A.V., 1986. The Green Hydra Symbiosis and Ammonium I. The Role of the Host in  
770 Ammonium Assimilation and its Possible Regulatory Significance. *Proc. R. Soc. Lond., Ser. B: Biol.*  
771 *Sci.* 229, 299-314. [10.1098/rspb.1986.0087](https://doi.org/10.1098/rspb.1986.0087)
- 772 Rees, T.A.V., 1989. The Green Hydra Symbiosis and Ammonium II. Ammonium Assimilation and  
773 Release by Freshly Isolated Symbionts and Cultured Algae. *Proc. R. Soc. Lond., Ser. B: Biol. Sci.*  
774 235
- 775 Rees, T.A.V., 1991. Are Symbiotic Algae Nutrient Deficient? *Proc. R. Soc. Lond. B. Biol. Sci.* 243,  
776 227-233. [10.1098/rspb.1991.0036](https://doi.org/10.1098/rspb.1991.0036)
- 777 Roffman, B., Lenhoff, H.M., 1969. Formation of Polysaccharides by *Hydra* from Substrates  
778 produced by their Endosymbiotic Algae. *Nature* 221, 381-382
- 779 Sanz-Luque, E., Chamizo-Ampudia, A., Llamas, A., Galvan, A., Fernandez, E., 2015.  
780 Understanding nitrate assimilation and its regulation in microalgae. *Front Plant Sci* 6, 899.  
781 [10.3389/fpls.2015.00899](https://doi.org/10.3389/fpls.2015.00899)
- 782 Schwentner, M., Bosch, T.C., 2015. Revisiting the age, evolutionary history and species level  
783 diversity of the genus *Hydra* (Cnidaria: Hydrozoa). *Mol. Phylogenet. Evol.* 91, 41-55.  
784 [10.1016/j.ympev.2015.05.013](https://doi.org/10.1016/j.ympev.2015.05.013)
- 785 Shinzato, C., Shoguchi, E., Kawashima, T., Hamada, M., Hisata, K., Tanaka, M., Fujie, M.,  
786 Fujiwara, M., Koyanagi, R., Ikuta, T., Fujiyama, A., Miller, D.J., Satoh, N., 2011. Using the  
787 *Acropora digitifera* genome to understand coral responses to environmental change. *Nature* 476,  
788 320-323. [10.1038/nature10249](https://doi.org/10.1038/nature10249)
- 789 Stanke, M., Keller, O., Gunduz, I., Hayes, A., Waack, S., Morgenstern, B., 2006. AUGUSTUS: ab  
790 initio prediction of alternative transcripts. *Nucleic Acids Res.* 34. [10.1093/nar/gkl200](https://doi.org/10.1093/nar/gkl200)
- 791 Tao, T.Y., Towle, H.C., 1986. Coordinate regulation of rat liver genes by thyroid hormone and dietary  
792 carbohydrate. *Ann. N. Y. Acad. Sci.* 478, 20-30
- 793 Tautz, D., Domazet-Loso, T., 2011. The evolutionary origin of orphan genes. *Nat. Rev. Genet.* 12,  
794 692-702. [10.1038/nrg3053](https://doi.org/10.1038/nrg3053)
- 795 The Gene Ontology, C., Ashburner, M., Ball, C.A., Blake, J.A., Botstein, D., Butler, H., Cherry, J.M.,  
796 Davis, A.P., Dolinski, K., Dwight, S.S., Eppig, J.T., Harris, M.A., Hill, D.P., Issel-Tarver, L.,  
797 Kasarskis, A., Lewis, S., Matese, J.C., Richardson, J.E., Ringwald, M., Rubin, G.M., Sherlock, G.,  
798 2000. Gene Ontology: tool for the unification of biology. *Nat. Genet.* 25, 25-29. [10.1038/75556](https://doi.org/10.1038/75556)
- 799 Thorington, G., Margulis, L., 1981. *Hydra viridis*: transfer of metabolites between *Hydra* and  
800 symbiotic algae. *The Biological Bulletin* 160, 175-188. [10.2307/1540911](https://doi.org/10.2307/1540911)

801 Vandermeulen, J.H., Davis, N.D., Muscatine, L., 1972. The effect of inhibitors of photosynthesis on  
802 zooxanthellae in corals and other marine invertebrates. *Mar. Biol.* 16, 185-191. 10.1007/bf00346940  
803 Worden, A.Z., Lee, J.H., Mock, T., Rouze, P., Simmons, M.P., Aerts, A.L., Allen, A.E., Cuvelier, M.L.,  
804 Derelle, E., Everett, M.V., Foulon, E., Grimwood, J., Gundlach, H., Henrissat, B., Napoli, C.,  
805 McDonald, S.M., Parker, M.S., Rombauts, S., Salamov, A., Von Dassow, P., Badger, J.H., Coutinho,  
806 P.M., Demir, E., Dubchak, I., Gentemann, C., Eikrem, W., Gready, J.E., John, U., Lanier, W.,  
807 Lindquist, E.A., Lucas, S., Mayer, K.F., Moreau, H., Not, F., Otilar, R., Panaud, O., Pangilinan, J.,  
808 Paulsen, I., Piegu, B., Poliakov, A., Robbens, S., Schmutz, J., Toulza, E., Wyss, T., Zelensky, A., Zhou,  
809 K., Armbrust, E.V., Bhattacharya, D., Goodenough, U.W., Van de Peer, Y., Grigoriev, I.V., 2009.  
810 Green evolution and dynamic adaptations revealed by genomes of the marine picoeukaryotes  
811 *Micromonas*. *Science* 324, 268-272. 10.1126/science.1167222  
812

## Figures

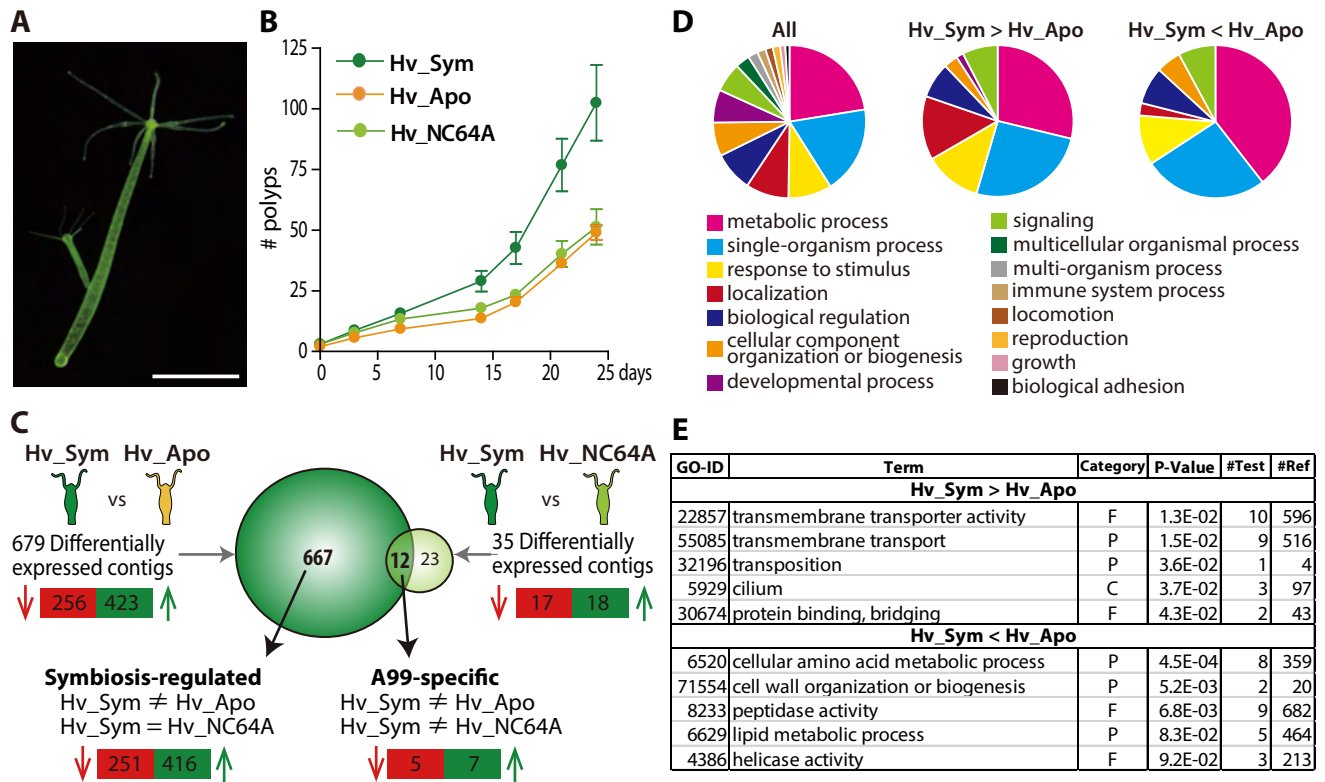

**Figure 1. Hydra growth and differential expression of Hydra genes resulting from symbiosis**

(A) *Hydra viridissima* strain A99 used for this study. Scale bar, 2 mm. (B) Growth rates of polyps grown with native symbiotic *Chlorella* A99 (Hv\_Sym, dark green), Aposymbiotic polyps from which *Chlorella* were removed (Hv\_Apo, orange) and aposymbiotic polyps reinfected with *Chlorella variabilis* NC64A (Hv\_NC64A, light green). (C) Graphic representation of differentially expressed genes identified by microarray. The transcriptome of Hv\_Sym is compared with that of Hv\_Apo and Hv\_NC64A with the number of down-regulated contigs in Hv\_Sym shown in red and those up-regulated in green. Genes differentially expressed in Hv\_Sym compared to both Hv\_Apo and Hv\_NC64A are given as “A99-specific”, those differentially expressed between Hv\_A99 and Hv\_Apo but not Hv\_NC64A as “Symbiosis-regulated”. (D) GO distribution of Biological Process at level 2 in all contigs (All), up-regulated contigs (Hv\_Sym > Hv\_Apo) and down-regulated contigs (Hv\_Sym < Hv\_Apo) in Hv\_Sym. (E) Overrepresented GO terms in up-regulated contigs (Hv\_Sym > Hv\_Apo) and down-regulated contigs (Hv\_Sym < Hv\_Apo). Category, F: molecular function, C: cellular component, P: biological process. P-values, probability of Fisher’s exact test. #Test, number of corresponding contigs in differentially expressed contigs. #Ref, number of corresponding contigs in all contigs.

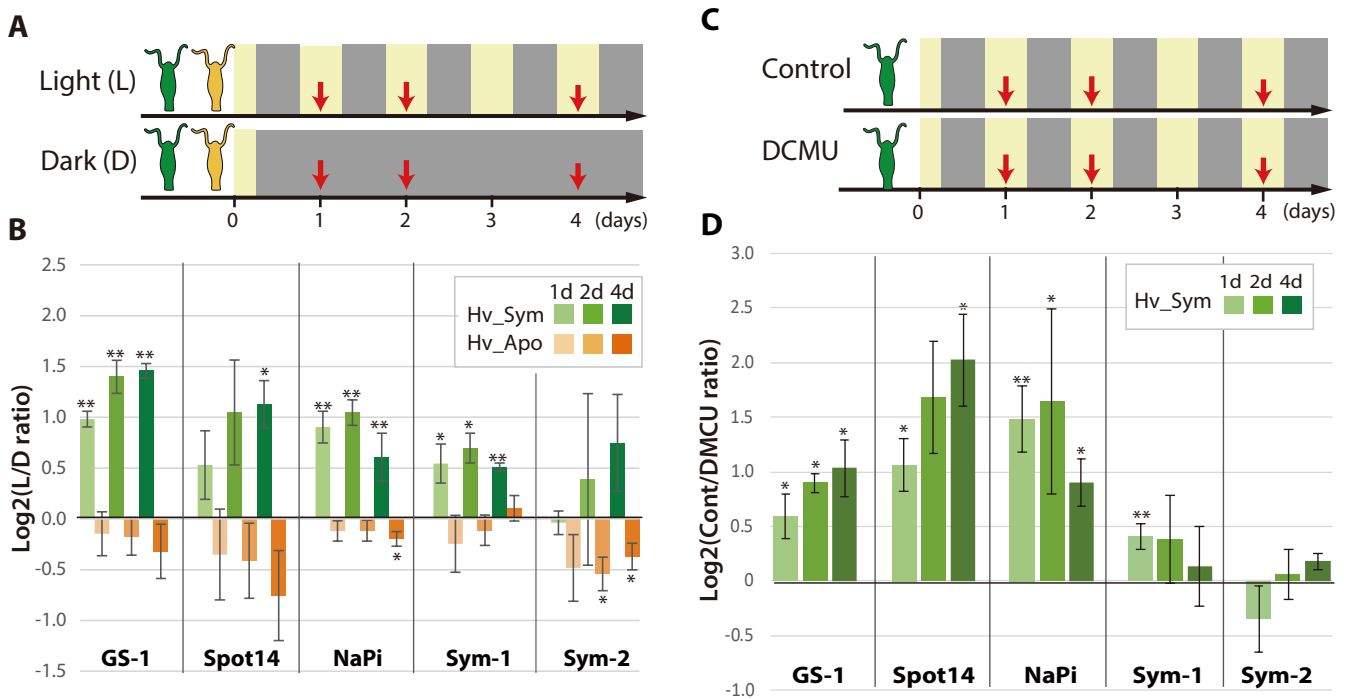

**Figure 2. Differential expression of *Hydra* genes under influence of *Chlorella* photosynthesis**

(A) Sampling scheme. Hv\_Sym (green) and Hv\_Apo (orange) were cultured under a standard light-dark regime (Light: L) and in continuous darkness (Dark: D), and RNA was extracted from the polyps at the days indicated by red arrows. (B) Expression difference of five A99-specific genes in Hv\_Sym (green bars) and Hv\_Apo (orange bars) between the light-dark condition and darkness. The vertical axis shows log scale ( $\log_2$ ) fold changes of relative expression level in Light over Dark. (C) Sampling scheme of inhibiting photosynthesis. (D) Differential expression of the five A99-specific genes under conditions allowing (Control) or inhibiting photosynthesis (DCMU). The vertical axis shows log scale ( $\log_2$ ) fold changes of relative expression level in Control over DCMU treated. T-tests were performed between Light and Dark

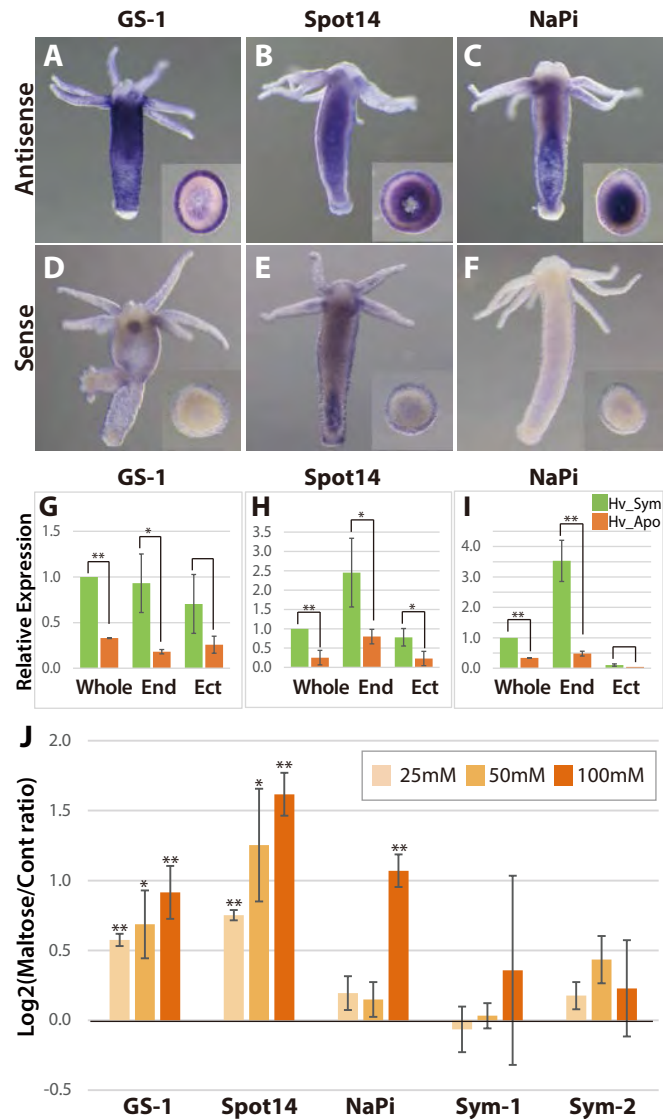

**Figure 3. Spatial expression patterns of genes coding for glutamine synthetase, Spot 14 and Na/Pi-transporter.**

A-F; Whole mount in situ hybridization using antisense (A-C) and sense probes (D-F; negative controls) for glutamine synthetase-1 (GS-1; left), Spot 14 (center) and Na/Pi-transporter (NaPi; right). Inserts show cross sections of the polyp' s body. (G-I) Relative expression levels of whole animal (whole), isolated endoderm (End) and isolated ectoderm (Ect) tissue of Hv\_Sym (green bars) and Hv\_Apo (orange bars). T-test was performed between Hv\_Sym and Hv\_apo. Pvalue, \* <0.05, \*\* <0.01. (J) Expression change of genes GS-1, Spot14, NaPi, Sym-1 and Sym-2 following exposure to 25mM, 50mM and 100mM maltose in Hv\_Apo. The vertical axis shows log scale (log2) fold changes of relative expression level of maltose-treated over the untreated Hv\_Apo control. T-test was performed between maltose-treated and control. Pvalue, \* <0.05, \*\* <0.01.

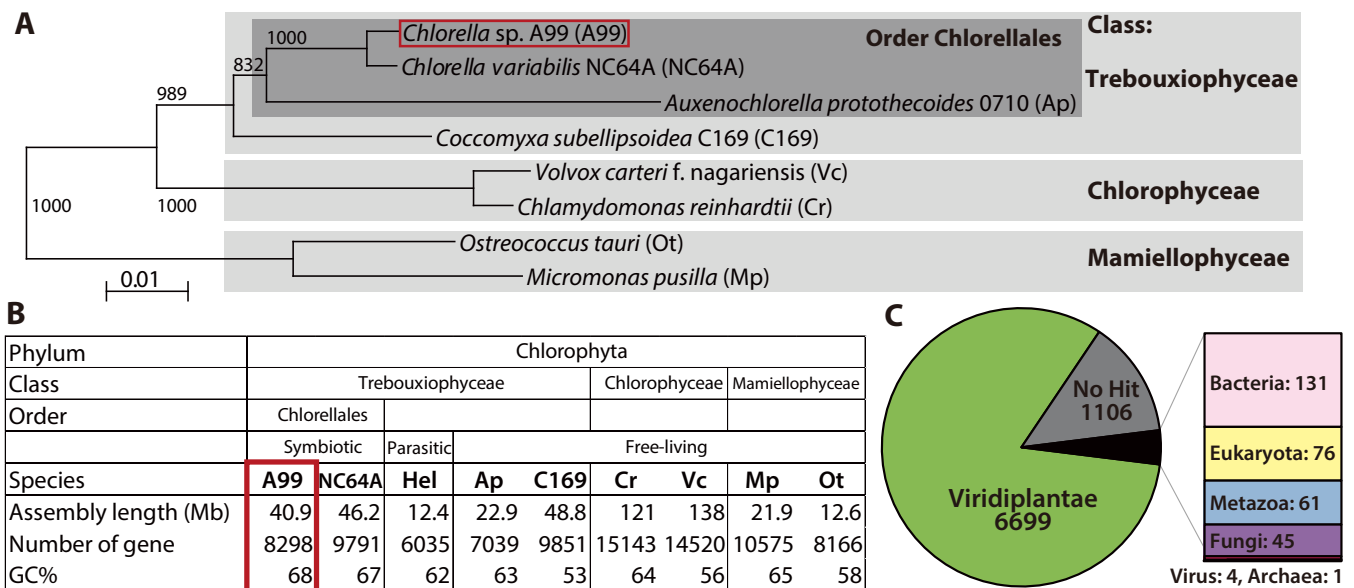

**Figure 4. Comparison of key features deduced from the *Chlorella* A99 genome with other green algae**

(A) Phylogenetic tree of eight genome sequenced chlorophyte green algae including *Chlorella* sp. A99. The NJ tree is based on sequences of the 18S rRNA gene, ITS1, 5.8S rRNA gene, ITS2 and 28S rRNA gene. (B) Genomic features and taxonomy of the sequenced chlorophyte green algae. Hel: *Helicosporidium* sp. ATCC50920. (C) The proportion of similarity of *Chlorella* A99 gene models to those of other organisms.



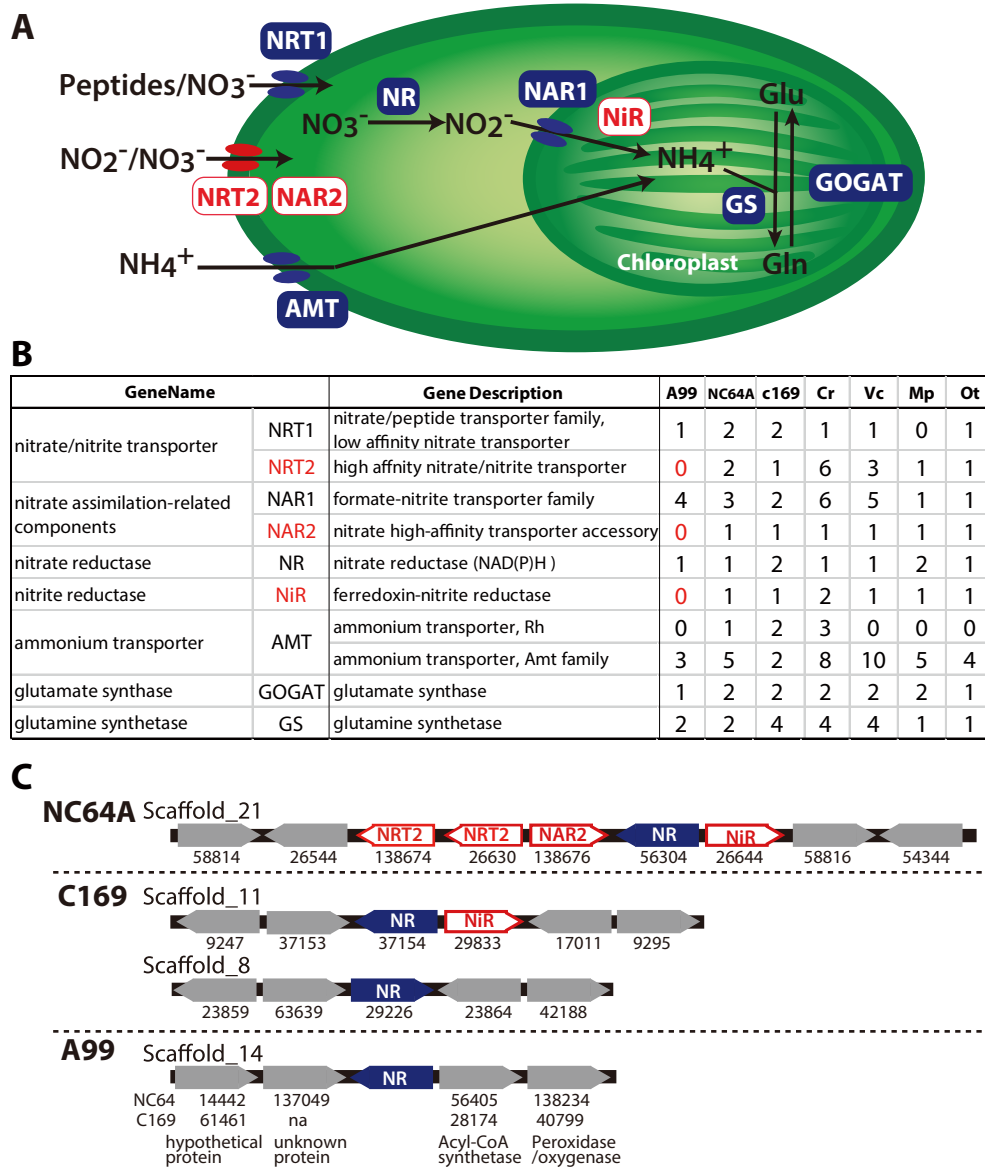

**Figure 5. Nitrogen assimilation pathways in *Chlorella* A99**

(A) Schematic diagram of the nitrogen assimilation pathway in plants showing the function of nitrate transporters NRT1 (peptides/nitrate transporter) and NRT2 (nitrate/nitrite transporter), nitrate assimilation-related components NAR1 and NAR2, nitrate reductase NR, nitrite reductase NiR, ammonium transporter AMT, glutamate synthetase GOGAT and glutamine synthetase GS. Genes shown in red boxes (NRT2, NAR2 and NiR) were not found in the *Chlorella* sp. A99 genome. (B) Table showing the number of nitrogen assimilation genes in *Chlorella* sp. A99 (A99), *Chlorella variabilis* NC64A (NC64A), *Coccomyxa subellipsoidea* C169 (C169), *Volvox carteri* f. nagariensis (Vc), *Chlamydomonas reinhardtii* (Cr), *Ostreococcus tauri* (Ot) and *Micromonas pusilla* (Mp). (C) Gene clusters of nitrate assimilation genes around the shared NR genes (blue) in the genomes of NC64A, C169 and A99. Red boxes show nitrate assimilation genes absent in A99 and gray boxes depict other genes. Numbers below the boxes are JGI protein IDs of NC64A and C169. Numbers below the genes of A99 are JGI protein IDs of the best hit genes in NC64A and C169 and their gene name.



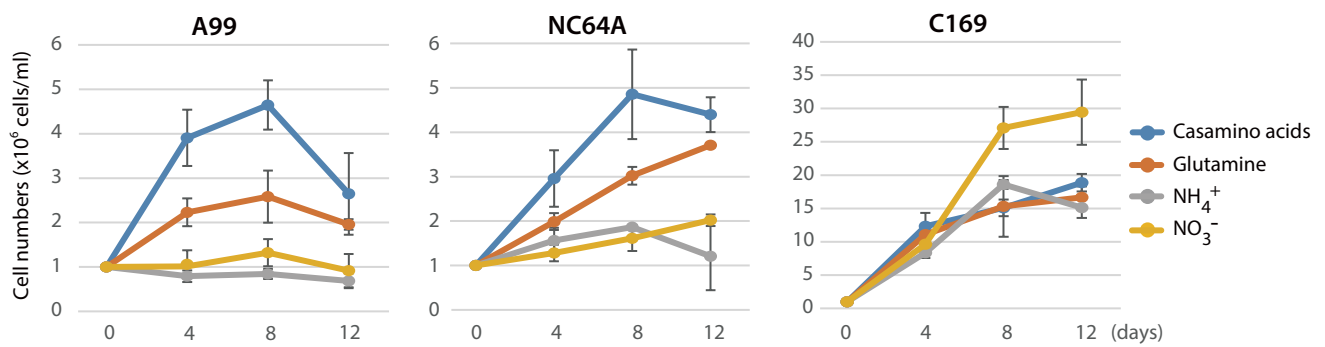

**Figure 6. Growth of green algae in presence of various nitrogen sources**

The growth rate of *Chlorella* A99 (A99), *Chlorella variabilis* NC64A (NC64A) and *Coccomyxa subellipsoidea* C-169 (C169) by in vitro culture was assessed for different nitrogen sources with casamino acids (blue), glutamine (orange), ammonium (gray) and nitrate (yellow). Mean number of algae per ml were determined at 4, 8, 12 days after inoculation with  $10^6$  cell/ml.

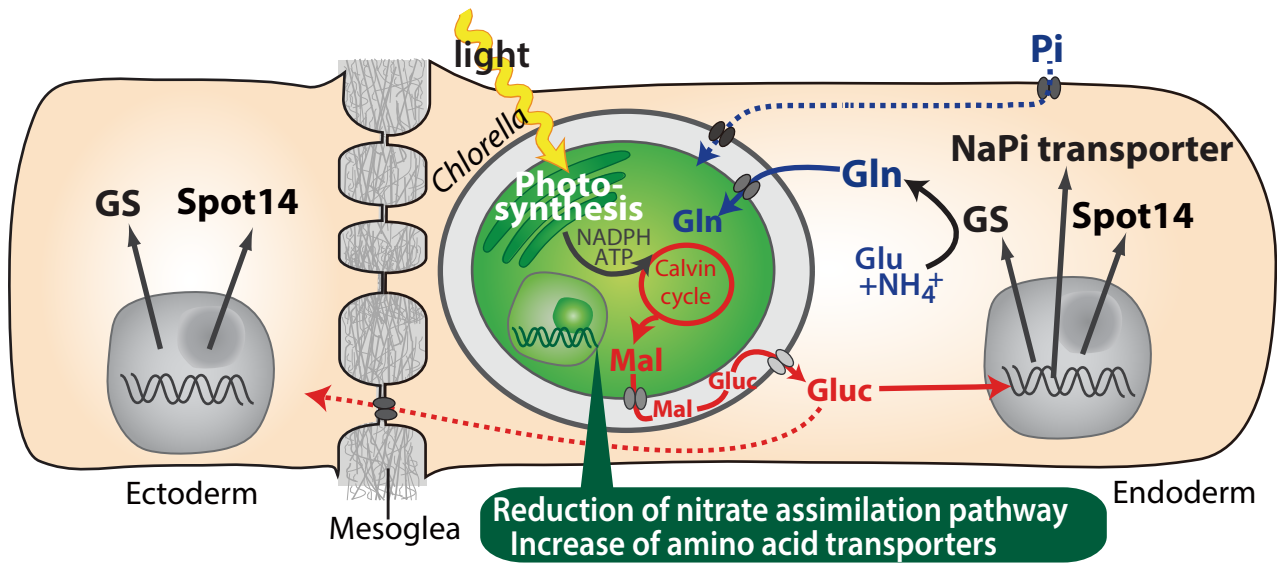

**Figure. 7. Molecular interactions in the symbiosis between green hydra and *Chlorella A99***

During light conditions, *Chlorella* performs photosynthesis and produces maltose (Mal) which is secreted into the Hydra symbiosome where it is possibly digested to glucose (Gluc), shown in red. The sugar induces expression of hydra genes encoding glutamine synthetase (GS), Na/Pi transporter (NaPi) and Spot14. GS synthesizes glutamine (Gln) from glutamate (Glu) and ammonium ( $\text{NH}_4^+$ ). Gln is used by *Chlorella* as a nitrogen source. Since the sugar also upregulates the gene for NaPi which controls intracellular phosphate levels, it might be involved in the supply of phosphorus to *Chlorella* as well (blue broken line). The sugar is transmitted or defused to the ectoderm (red broken line) and there induces the expression of GS and Spot14. In the *Chlorella A99* genome, degeneration of the nitrate assimilation system and an increase of amino acid transporters was observed (green balloon).

## Supplemental Tables

### Supplemental Table 1.

List of the A99 specific genes differentially expressed in Hv\_Sym compared to both Hv\_Apo and Hv\_NC64A and fold changes of expression level examined by microarray and qPCR.

#### A99>Apo, NC64A

| Probe name (gene ID) | Microarray |           | qPCR    |           | Seq Description (1)                                   | InterProScan                                              |
|----------------------|------------|-----------|---------|-----------|-------------------------------------------------------|-----------------------------------------------------------|
|                      | A99/Apo    | A99/NC64A | A99/Apo | A99/NC64A |                                                       |                                                           |
| rc_13579             | 12.8       | 4.0       | 11.2    | 4.0       | uncharacterized protein LOC101238438 [Hydra vulgaris] |                                                           |
| rc_12891             | 9.0        | 2.9       | 14.6    | 6.9       | (Hydra viridis specific)                              |                                                           |
| 27417                | 4.5        | 4.8       | 3.0     | 3.0       |                                                       | IPR009786 Spot_14                                         |
| rc_26218             | 3.3        | 2.4       | 2.5     | 2.3       |                                                       | PTHR10010 Sodium-dependent phosphate transport protein 2C |
| 1046                 | 3.1        | 2.1       | 2.2     | 1.6       | glutamine synthetase-like                             |                                                           |

#### A99<Apo, NC64A

| Probe name (gene ID) | Microarray |           | qPCR    |           | Seq Description                 | InterProScan                                           |
|----------------------|------------|-----------|---------|-----------|---------------------------------|--------------------------------------------------------|
|                      | Apo/A99    | NC64A/A99 | Apo/A99 | NC64A/A99 |                                 |                                                        |
| NPNHRC_26859         | 83.2       | 9.7       | ∞       | ∞         | (Hydra viridis specific)        |                                                        |
| RC_FVQRUGK01AXSJ     | 13.7       | 2.6       | 2.1     | 1.5       | acetoacetyl-CoA synthetase-like |                                                        |
| rc_14793             | 7.2        | 4.1       | 9.4     | 4.8       | 2-isopropylmalate synthase      | IPR013785 Aldolase_TIM,                                |
| FV81RT002HT2FL       | 2.8        | 2.0       | 3.1     | 1.8       | histidine ammonia-lyase-like    | IPR001106 Aromatic_Lyase<br>IPR008948 L-Aspartase-like |
| NPNHRC_12201         | 2.7        | 2.3       | 2.6     | 2.5       | (Hydra viridis specific)        |                                                        |

(1) Gene annotations by blast2go.

## Supplemental Table 2.

List of the genes differentially expressed between Hv\_Sym and Hv\_Apo and fold changes of expression level examined by microarray and qPCR.

A99>Apo

| Probe name<br>(gene ID) | Microarray | qPCR    | HS_Best Hit (1)                                                                                            | InterProScan (2)                                                                 |
|-------------------------|------------|---------|------------------------------------------------------------------------------------------------------------|----------------------------------------------------------------------------------|
|                         | A99/Apo    | A99/Apo |                                                                                                            |                                                                                  |
| 5168                    | 9.3        | 7.4     |                                                                                                            | IPR000157 TIR_dom<br>PTHR23097 Tumor necrosis factor receptor superfamily member |
| 6508                    | 6.7        | 2.9     |                                                                                                            | IPR011029:DEATH-like_dom                                                         |
| 11411                   | 2.9        | 2.0     | C-type mannose receptor 2                                                                                  | IPR000742 EG-like_dom<br>IPR001304 C-type_lectin                                 |
| 26108                   | 7.2        | 7.2     | ephrin type-A receptor 6 isoform a                                                                         | no IPS match                                                                     |
| rc_2417                 | 5.4        | 3.5     |                                                                                                            | IPR000488 Death_domain                                                           |
| rc_24563                | 6.1        | 6.7     | Proline-rich transmembrane protein 1                                                                       | IPR007593 CD225/Dispanin_fam<br>PTHR14948 NG5                                    |
| rc_9398                 | 6.2        | 5.4     | protein-kinase, interferon-inducible double stranded RNA dependent inhibitor, repressor of (P58 repressor) | PTHR11697 general transcription factor 2-related zinc finger protein             |

A99<Apo

| Probe name<br>(gene ID) | Microarray | qPCR    | HS_best hit                                         | InterProScan                                                                                                     |
|-------------------------|------------|---------|-----------------------------------------------------|------------------------------------------------------------------------------------------------------------------|
|                         | Apo/A99    | Apo/A99 |                                                     |                                                                                                                  |
| rc_10789                | 2.5        | 3.7     | endoribonuclease Dicer                              | IPR000999 RNase_III_dom<br>PTHR1495 helicase-related                                                             |
| rc_12826                | 3.0        | 2.3     | interferon regulatory factor 1                      | IPR001346 Interferon_reg_fact_DNA-bd_dom;<br>IPR011991 WHTH_DNA-bd_dom<br>PTHR11949 interferon regulatory factor |
| rc_8898                 | 6.1        | 4.1     | leucine-rich repeat-containing protein 15 isoform b | IPR001611 Leu-rich_rp<br>PTHR24373 Toll-like receptor 9                                                          |
| FV81RT001CSTY           | 3.2        | 2.0     | astrocytic phosphoprotein PEA-15                    | IPR001875 DED, IPR011029 DEATH-like_dom                                                                          |
| RSASM_17752             | 4.0        | 2.1     | CD97 antigen isoform 2 precursor                    | IPR000832 GPCR_2_secretin-like<br>PTHR12011 vasoactive intestinal polypeptide receptor 2                         |

(1) Best hit human genes. (2) Results of domain search.

### Supplemental Table 3

Summary of sequence data for assembling *Chlorella* sp. A99 genome sequences

|                                   |                  |                |
|-----------------------------------|------------------|----------------|
| <b>Number of reads</b>            | 85469010         |                |
| <b>Number of reads assembled</b>  | 61838513         |                |
| <b>Number of bases</b>            | 17398635102      |                |
|                                   | <b>Scaffolds</b> | <b>Contigs</b> |
| <b>Total length of sequence</b>   | 40934037         | 40687875       |
| <b>Total number of sequences</b>  | 82               | 7455           |
| <b>Maximum length of sequence</b> | 4003385          | 171868         |
| <b>N50</b>                        | 1727419          | 12747          |
| <b>GC contents (%)</b>            | 68.07 %          | 69.95 %        |

## Supplemental Table 4

### A. The number of Pfam domains related to amino acids transport

| Pfam Domain Name | A99 | NC64A | c169 | Cr | Vc | Mp | Ot |
|------------------|-----|-------|------|----|----|----|----|
| Aa_trans         | 30  | 38    | 21   | 9  | 7  | 9  | 8  |
| AA_permease      | 4   | 6     | 15   | 5  | 6  | 1  | 1  |

### B. Ortholog groups including Aa\_trans containing genes

| Ortholog Group ID | A99 | NC64A | c169 | Cr | Vc | Mp | Ot |
|-------------------|-----|-------|------|----|----|----|----|
| OG0000040         | 12  | 12    | 6    | 3  | 1  | 0  | 0  |
| OG0000324         | 6   | 7     | 1    | 2  | 1  | 0  | 0  |
| OG0001336         | 2   | 1     | 1    | 1  | 1  | 1  | 1  |
| OG0004053         | 1   | 2     | 2    | 1  | 0  | 0  | 0  |
| OG0006517         | 1   | 1     | 0    | 0  | 0  | 0  | 0  |
| OG0001069         | 1   | 2     | 3    | 1  | 1  | 1  | 1  |
| OG0000830         | 1   | 4     | 1    | 2  | 1  | 2  | 1  |
| OG0002190         | 1   | 1     | 1    | 1  | 1  | 1  | 1  |
| OG0011340         | 1   | 0     | 0    | 0  | 0  | 0  | 0  |
| OG0004863         | 1   | 5     | 0    | 0  | 0  | 0  | 0  |
| OG0000468         | 2   | 2     | 2    | 2  | 2  | 2  | 2  |
| OG0003354         | 2   | 1     | 1    | 1  | 1  | 1  | 1  |
| OG0003801         | 1   | 1     | 0    | 1  | 1  | 1  | 1  |

### C. Blast best hit genes of Arabidopsis thaliana of genes belonging to OG0000040 and OG0000324

| OG0000040           | Best Hit gene ID | Best Hit gene of Arabidopsis thaliana               | e-value |
|---------------------|------------------|-----------------------------------------------------|---------|
| scaffold1.g5447.t1  | NP_196484.1      | amino acid permease 2                               | 4E-62   |
| scaffold1.g5579.t1  | NP_196484.1      | amino acid permease 2                               | 7E-32   |
| scaffold12.g8277.t1 | NP_196484.1      | amino acid permease 2                               | 1E-34   |
| scaffold13.g380.t1  | NP_196484.1      | amino acid permease 2                               | 6E-12   |
| scaffold14.g1284.t1 | NP_196484.1      | amino acid permease 2                               | 2E-33   |
| scaffold2.g7119.t1  | NP_001318716.1   | lysine histidine transporter 1                      | 9E-73   |
| scaffold2.g7251.t1  | NP_196484.1      | amino acid permease 2                               | 3E-59   |
| scaffold21.g2221.t1 | NP_175076.2      | amino acid permease 5                               | 9E-60   |
| scaffold40.g5168.t1 | NP_196484.1      | amino acid permease 2                               | 5E-38   |
| scaffold5.g864.t1   | NP_196484.1      | amino acid permease 2                               | 2E-60   |
| scaffold6.g2644.t1  | NP_196484.1      | amino acid permease 2                               | 2E-58   |
| scaffold6.g2815.t1  | NP_186825.2      | Transmembrane amino acid transporter family protein | 3E-43   |

| <b>OG0000324</b>     | <b>Best Hit gene ID</b> | <b>Best Hit gene of Arabidopsis thaliana</b>        | <b>e-value</b> |
|----------------------|-------------------------|-----------------------------------------------------|----------------|
| scaffold10.g2481.t1  | NP_001330273.1          | Transmembrane amino acid transporter family protein | 7E-06          |
| scaffold11.g3916.t1* | NP_172258.1             | Histone superfamily protein                         | 1E-47          |
|                      | NP_565239.1             | Transmembrane amino acid transporter family protein | 7E-40          |
| scaffold15.g4364.t1  | NP_566854.1             | Transmembrane amino acid transporter family protein | 8E-31          |
| scaffold2.g7197.t1   | NP_566854.1             | Transmembrane amino acid transporter family protein | 2E-24          |
| scaffold21.g2185.t1  | NP_565239.1             | Transmembrane amino acid transporter family protein | 5E-14          |
| scaffold3.g6325.t1   | NP_566854.1             | Transmembrane amino acid transporter family protein | 6E-34          |

\* This sequence consists from a region similar to NP\_172258.1 and a region similar to NP\_565239.1.

## Supplementary Table 5

Sequence ID of nitrogen assimilation genes

| A99                                                                                 | NC64A  | c169  | Cr            | Vol             | Mp    | Ot    |
|-------------------------------------------------------------------------------------|--------|-------|---------------|-----------------|-------|-------|
| <b>GOGAT (glutamate synthase)*</b>                                                  |        |       |               |                 |       |       |
| scaffold18.g1969.t1                                                                 | 33619  | 22625 | Cre12.g514050 | Vocar.0006s0290 | 57115 | 29431 |
|                                                                                     | 142154 | 53183 | Cre13.g592200 | Vocar.0064s0005 | 70244 |       |
| <b>GS (Glutamine synthetase)*</b>                                                   |        |       |               |                 |       |       |
| scaffold6.g2861.t1                                                                  | 56005  | 23194 | Cre02.g113200 | Vocar.0001s1591 | 4228  | 15060 |
| scaffold7.g3389.t1                                                                  | 143431 | 23517 | Cre03.g207250 | Vocar.0011s0254 |       |       |
|                                                                                     |        | 30043 | Cre12.g530600 | Vocar.0028s0089 |       |       |
|                                                                                     |        | 31742 | Cre12.g530650 | Vocar.0028s0090 |       |       |
| <b>AMT (ammonium transporter, Rh)</b>                                               |        |       |               |                 |       |       |
| na                                                                                  | 21763  | 65570 | Cre06.g284100 | na              | na    | na    |
|                                                                                     |        | 65572 | Cre06.g284150 |                 |       |       |
| <b>AMT (ammonium transporter, Amt family)</b>                                       |        |       |               |                 |       |       |
| scaffold2.g7405.t1                                                                  | 36096  | 47532 | Cre02.g111050 | Vocar.0001s1695 | 29536 | 29863 |
| scaffold2.g7406.t1                                                                  | 56592  | 52218 | Cre03.g159254 | Vocar.0008s0224 | 45964 | 18135 |
| scaffold3.g6262.t1                                                                  | 58614  |       | Cre06.g293051 | Vocar.0019s0251 | 48406 | 25714 |
|                                                                                     | 136742 |       | Cre07.g355650 | Vocar.0022s0058 | 50351 | 29181 |
|                                                                                     | 141357 |       | Cre09.g400750 | Vocar.0028s0082 | 59331 |       |
|                                                                                     |        |       | Cre12.g531000 | Vocar.0049s0040 |       |       |
|                                                                                     |        |       | Cre13.g569850 | Vocar.0051s0018 |       |       |
|                                                                                     |        |       | Cre14.g629920 | Vocar.0054s0046 |       |       |
|                                                                                     |        |       |               | Vocar.0063s0027 |       |       |
|                                                                                     |        |       |               | Vocar.0069s0013 |       |       |
| <b>NRT2 (high affinity nitrate/nitrite transporter)*</b>                            |        |       |               |                 |       |       |
| na                                                                                  | 26630  | 28993 | Cre02.g110800 | Vocar.0008s0137 | 49583 | 24168 |
|                                                                                     | 138674 |       | Cre03.g150101 | Vocar.0008s0138 |       |       |
|                                                                                     |        |       | Cre03.g150151 | Vocar.0008s0200 |       |       |
|                                                                                     |        |       | Cre09.g396000 |                 |       |       |
|                                                                                     |        |       | Cre09.g410800 |                 |       |       |
|                                                                                     |        |       | Cre09.g410850 |                 |       |       |
| <b>NRT1 (nitrate/peptide transporter family, low affinity nitrate transporter)*</b> |        |       |               |                 |       |       |
| scaffold14.g1044.t1                                                                 | 23105  | 19259 | Cre04.g224700 | Vocar.0049s0020 | na    | 2706  |
|                                                                                     | 144528 | 48785 |               |                 |       |       |
|                                                                                     |        |       |               |                 |       |       |
| <b>NAR1 (formate-nitrite transporter family)*</b>                                   |        |       |               |                 |       |       |



|                                                            |        |       |               |                 |       |       |
|------------------------------------------------------------|--------|-------|---------------|-----------------|-------|-------|
| scaffold12.g8267.t1                                        | 34412  | 20872 | Cre01.g012050 | Vocar.0007s0061 | 70731 | 19784 |
| scaffold18.g1993.t1                                        | 25301  | 46302 | Cre04.g217915 | Vocar.0008s0135 |       |       |
| scaffold4.g4586.t1                                         | 53335  |       | Cre06.g309000 | Vocar.0011s0110 |       |       |
| scaffold6.g2788.t1                                         |        |       | Cre07.g335600 | Vocar.0030s0055 |       |       |
|                                                            |        |       | Cre12.g541200 | Vocar.0046s0010 |       |       |
|                                                            |        |       | Cre12.g541250 |                 |       |       |
| <b>NAR2 (nitrate high-affinity transporter accessory)*</b> |        |       |               |                 |       |       |
| na                                                         | 138676 | 47957 | Cre09.g410900 | Vocar.0008s0139 | 70904 | 24167 |
| <b>NiR (ferredoxin-nitrite reductase)*</b>                 |        |       |               |                 |       |       |
| na                                                         | 26644  | 29833 | Cre09.g410750 | Vocar.0008s0136 | 70828 | 26396 |
| <b>NR (nitrate reductase (NAD(P)H))*</b>                   |        |       |               |                 |       |       |
| scaffold14.g1111.t1                                        | 56304  | 37154 | Cre09.g410950 | Vocar.0008s0140 | 39565 | 19576 |
|                                                            |        | 29226 |               |                 | 57689 |       |

Sequences were obtained from the database of JGI genome portal in *Chlorella variabilis* NC64A (NC64A), *Coccomyxa subellipsoidea* C-169 (C169), *Volvox carteri* (Vc), *Micromonas pusilla* (Mp) and *Ostreococcus tauri* (Ot) and of Phytozome in *Chlamydomonas reinhardtii*.

\* The number of genes in NC64A, C169, Vc, Cr, Mp, Ot were based on Sanz-Luque et al. (2015)

## Supplemental Table 6

Composition of modified Bold's Basal Medium for 1 liter (pH. 7)

|                                                                     |              |
|---------------------------------------------------------------------|--------------|
| $\text{KH}_2\text{PO}_4$                                            | 175 mg       |
| $\text{K}_2\text{HPO}_4$                                            | 100 mg       |
| $\text{MgSO}_4 \cdot 7\text{H}_2\text{O}$                           | 75 mg        |
| $\text{CaCl}_2 \cdot 2\text{H}_2\text{O}$                           | 25 mg        |
| NaCl                                                                | 25 mg        |
| $\text{FeSO}_4 \cdot 7\text{H}_2\text{O}$ , $\text{H}_2\text{SO}_4$ | 5.0 mg, 1ul  |
| $\text{Na}_2\text{EDTA}$ , KOH                                      | 50 mg, 31 mg |
| $\text{H}_3\text{BO}_3$                                             | 11.4 mg      |
| $\text{ZnSO}_4 \cdot 7\text{H}_2\text{O}$                           | 8.8 mg       |
| $\text{MnCl}_2 \cdot 7\text{H}_2\text{O}$                           | 1.4 mg       |
| $\text{MoO}_3$                                                      | 0.7 mg       |
| $\text{CuSO}_4 \cdot 5\text{H}_2\text{O}$                           | 1.6 mg       |
| $\text{Co}(\text{NO}_3)_2 \cdot 6\text{H}_2\text{O}$                | 0.5 mg       |
| glucose                                                             | 5 g          |
| Vitamine B1 (Thiaminhydrochloride)                                  | 1.2 mg       |
| Vitamine B12 (Cyanocobalamin)                                       | 0.01 mg      |

### Nitrogen Components

|                        |        |
|------------------------|--------|
| $\text{NaNO}_3$        | 250 mg |
| $\text{NH}_4\text{Cl}$ | 155 mg |
| Glutamine              | 426 mg |
| Casamino acids         | 426 mg |

## Supplemental Table 7

### A. Primer sequences for quantitative real time RT-PCR

| Gene ID          | Forward Primers           | Reverse Primers           |
|------------------|---------------------------|---------------------------|
| 5168             | ACTTTTCGGATATCAAACCCATTC  | AATTGAACCTATTCCTCGAACGTC  |
| 6508             | GCATCAAATGCGTCCAAATAAC    | TTACCGAATATTCAGGCCTTTCTC  |
| rc_2417          | CTTATTGCTCATGACCGTAAAGATG | TCGATTTTCACCCTTGATGG      |
| 24563            | TGCGCCTTAGTTATATCTCCTCTC  | TCTCTTTCTTGTGTTGTTTCTTTCC |
| rc_9398          | GATGTTTGTAGAACACGTTGGATTG | TTCAAGACAGGAGACCACAGG     |
| 11411            | TCTTGCTCATGCAACACTGG      | CGGTTTACTGCCAATCACATAC    |
| 26108            | AATTCCTGTCCGACTGATTTC     | CCAAATCGACCCTTACTTGTTTG   |
| rc_10789         | TTGCAAGAATATCTGCTGCTAAG   | AGAAATCAACGGAGATCGTGTAG   |
| rc_12826         | TTTATTCAAGCAATGGGCAATC    | CGTTGCGTTTGTCCCTTTC       |
| rc_8898          | TTAAGCATCAACGAAATATCCACTC | ACTGTTTGTGTTGCAAGTGTAGAGC |
| FV81RT001CSTY    | TTAGAAATGCATGGTGTGTTGG    | CGGGTCTGTCAAGCATAAGAAG    |
| RSASM_17752      | AGAATTGCTTGGGGTGTTC       | GCATATCCACGAATGAGACAAAAG  |
| rc_13579         | ACGGAGGTTTGGGGAAATAG      | TTTGGTCTTAGGAGTGCTCGTC    |
| 27417            | TGTACCTGTCCATGGAATTAAGC   | TACCTTGTCGAATAGCAGCTC     |
| rc_26218         | TTAAACTTCGAAGCTGGAAATGG   | TTAGCGAAGACTTTGTCTGATGG   |
| 1046             | GTGGGTTGCTCGTTATCTACTTG   | CACCAGGGATGGGTTTAGG       |
| rc_12891         | GTCGGTATGGGAGGTGGAG       | CCCAATATACCGCCGACAG       |
| NPNHRC_26859     | TGATGAACAAAAGAGCCGTATCTC  | GCACGAACCGATACGTCAAC      |
| RC_FVQRUGK01AXSJ | TCCCTTATGCACAGGTACGG      | GGATCAATAACTGGTGGCACTG    |
| rc_14793         | CACCCTTGGGCTGGTAAG        | GGGATCTATGGGCAATAAAGG     |
| FV81RT002HT2FL   | CCAGCAAAAGCCCTTGATTAC     | CCTGAATTCACCCCTCCATC      |
| NPNHRC_12201     | GTCGGTATGGGAGGTGGAG       | CCCAATATACCGCCGACAG       |
| finalASM_15403   | AATAGGTGATGCTGGAGAGAATC   | AGTATATATGGCTCTCGAGAGTG   |
| finalASM_344     | ATGTGAGCCATGTCCAATTGGA    | CACTTCTATIGGCAGCTTTCTC    |
| tubulin alpha    | TTCCTTGCTCATGGAACGAC      | AGCAGGGTAAACTGCAAACTCC    |
| ef1-alpha        | ACCAACATTGTCACCTGGGAG     | GGAACAGTACCTGTTGGTCTG     |

### B. Primer sequences for *in situ* hybridization probes

| Gene Name | Forward Primers           | Reverse Primers          |
|-----------|---------------------------|--------------------------|
| GS-1      | TTGCTGACCCATTCAGAGGA      | CCGAACCCAAAAGACCAAAG     |
| NaPi      | TTGGGAACACAACCTGCTGAT     | AAAGTTTAGCGAAGACTTTGTCTG |
| Spot14    | GAGAAATTGATTAAGCAAGTAAGAG | GGTCAATTGCTCGGTTTC       |

C. Primer sequences for PCR amplification of nitrogen assimilation genes in green algae

| <b>Gene</b> | <b>Forward Primers</b>    | <b>Reverse Primers</b>  |
|-------------|---------------------------|-------------------------|
| NRT2        | YCAGTTCTGGTSCKSBRYSMTGTTC | CCCACATGGGRAASYRRATG    |
| NiR         | ACATCACCACVCGCGCCAACATC   | TYGWRKCCMACGTCGTTGATGTG |
| NR          | CTGGTGGTACMRSCCSGASTT     | SAKCATSCCMATSASRTTCC    |

D. Primer sequences for PCR amplification of 18S ribosomal DNA gene in green algae

| <b>Forward Primers</b>  | <b>Reverse Primers</b> |
|-------------------------|------------------------|
| GGAATAACACGATAGGACTCTGG | GACGGGCGGTGTGTACAAAG   |

## Supplementary Figures

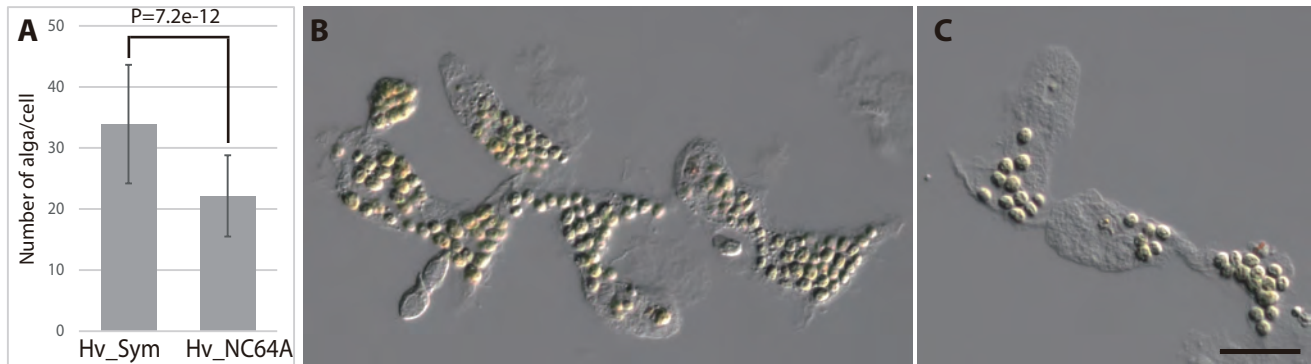

### Supplementary Figure 1. *Chlorella* sp. A99 and *Chlorella variabilis* NC64A in *Hydra viridissima* A99

(A) Average number of algae per *Hydra* cell, for native *Chlorella* sp. A99 (Hv\_Sym) and aposymbiont *Hydra* re-infected with *Chlorella variabilis* NC64A (Hv\_NC64A). (B) Endodermal epithelial cells of Hv\_Sym showing intracellular algae (C) Endodermal epithelial cells of Hv\_NC64A. Scale bar, 20  $\mu$ m

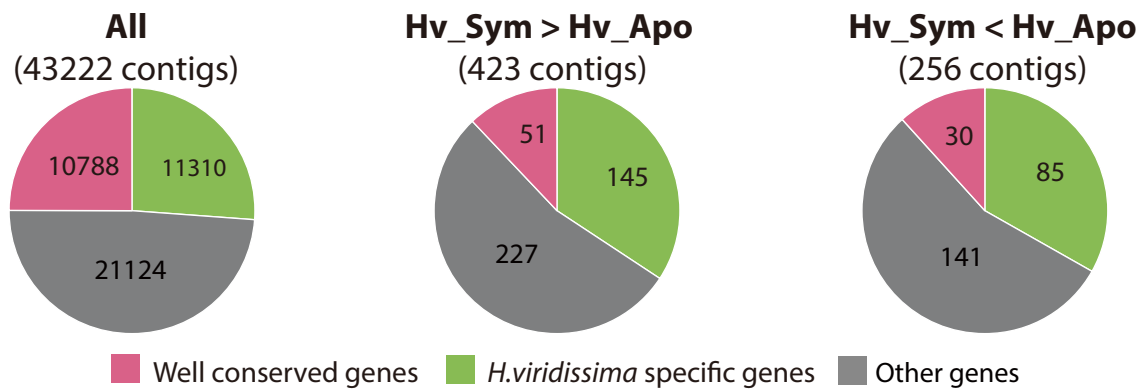

**Supplementary Figure 2. Conserved genes and species-specific genes differentially expressed in symbiotic *Hydra***

Distribution of well-conserved *Hydra viridissima* genes (pink), *Hydra viridissima*-specific genes (green) and other genes (shared by some but not all metazoans, gray) among eight metazoans: *Hydra magnipapillata*, *Acropora digitifera*, *Nematostella vectensis*, *Strongylocentrotus purpuratus*, *Branchiostoma floridae*, *Homo sapiens* and *Drosophila melanogaster* and *Hydra viridissima*. Pie charts are shown for all contigs (All), up-regulated contigs (Hv\_Sym > Hv\_Apo) and down-regulated contigs (Hv\_Sym < Hv\_Apo).

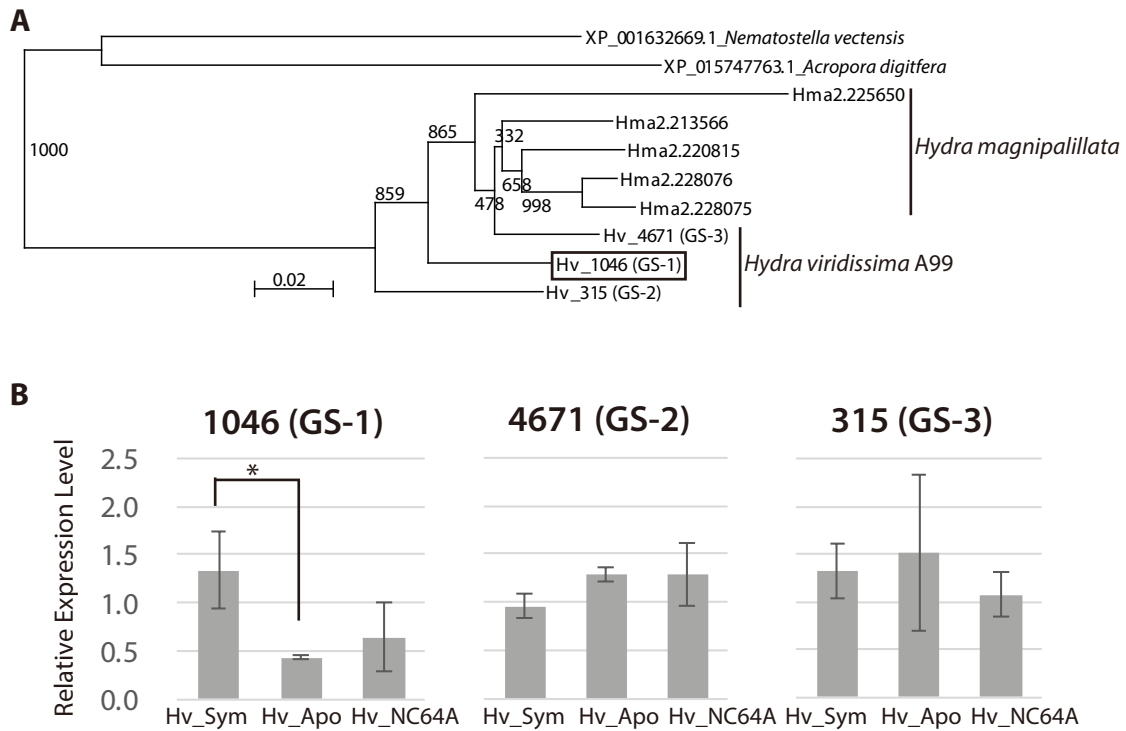

**Supplementary Figure 3. Glutamine synthetase (GS) genes in Cnidarians.**

(A) Phylogenetic tree of the GS gene of four species in Cnidarians. While anthozoans (*Nematostella vectensis*, *Acropora digitifera*) have a single GS gene, *Hydra magnipapillata* (Hma) has five genes and *Hydra viridissima* A99 has three genes, Hv\_1046 (GS-1), Hv\_315 (GS-2) and Hv\_4671 (GS-3). (B) Relative expression level of the three GS genes in Hv\_Sym, Hv\_NC64A and Hv\_Apo as determined by microarray analysis.

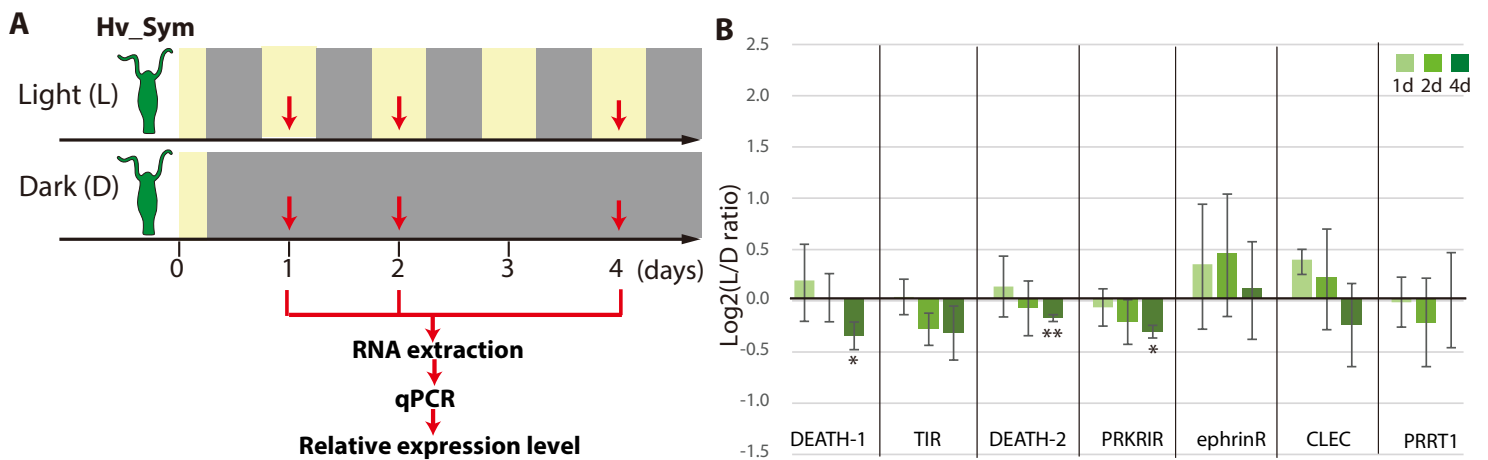

**Supplementary Figure 4. Differential expression of symbiosis-dependent *Hydra* genes grown under light/dark condition and in darkness.**

(A) Sampling scheme. *Hv\_Sym* was cultured in the light-dark condition (Light: L) and in the continuous dark (Dark: D). Gene expression levels were examined by qPCR at 1, 2, 4 days for each condition (red arrows). (B) Expression difference of the genes in *Hv\_A99* between the two conditions. DEATH-1 and DEATH-2: Death domain containing proteins (gene ID: 6508 and rc\_2417), TIR: Toll/interleukin-1 receptor domain containing protein (gene ID: 5168), PRKRIR: protein-kinase interferon-inducible double stranded RNA dependent inhibitor, repressor of (p58 repressor) (gene ID: rc\_9398), ephrinR: ephrin receptor (gene ID: 26108), CLEC: C-type mannose receptor (gene ID: 11411), PRRT1: proline-rich transmembrane protein 1 (gene ID: rc\_24563). The vertical axis shows log scale (log<sub>2</sub>) fold change of relative expression levels in the light condition over the dark condition. T-test evaluate, \* < 0.05, \*\* < 0.01.



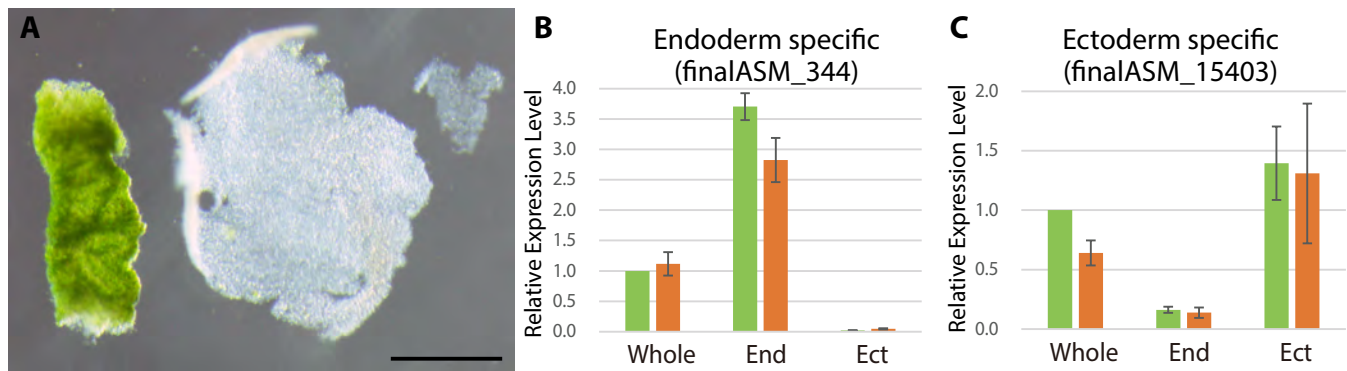

**Supplementary Figure 5. Tissue isolation of green hydra.**

(A) Isolated endoderm (left) and isolated ectoderm (right). Scale bar, 1 mm. Expression levels of an endoderm specific gene finalASM\_15403 (B) and that of an ectoderm specific gene finalASM\_344 (C) in whole hydra (Whole) and isolated endoderm (End) and ectoderm (Ect) were examined to confirm whether tissue isolation had performed properly.

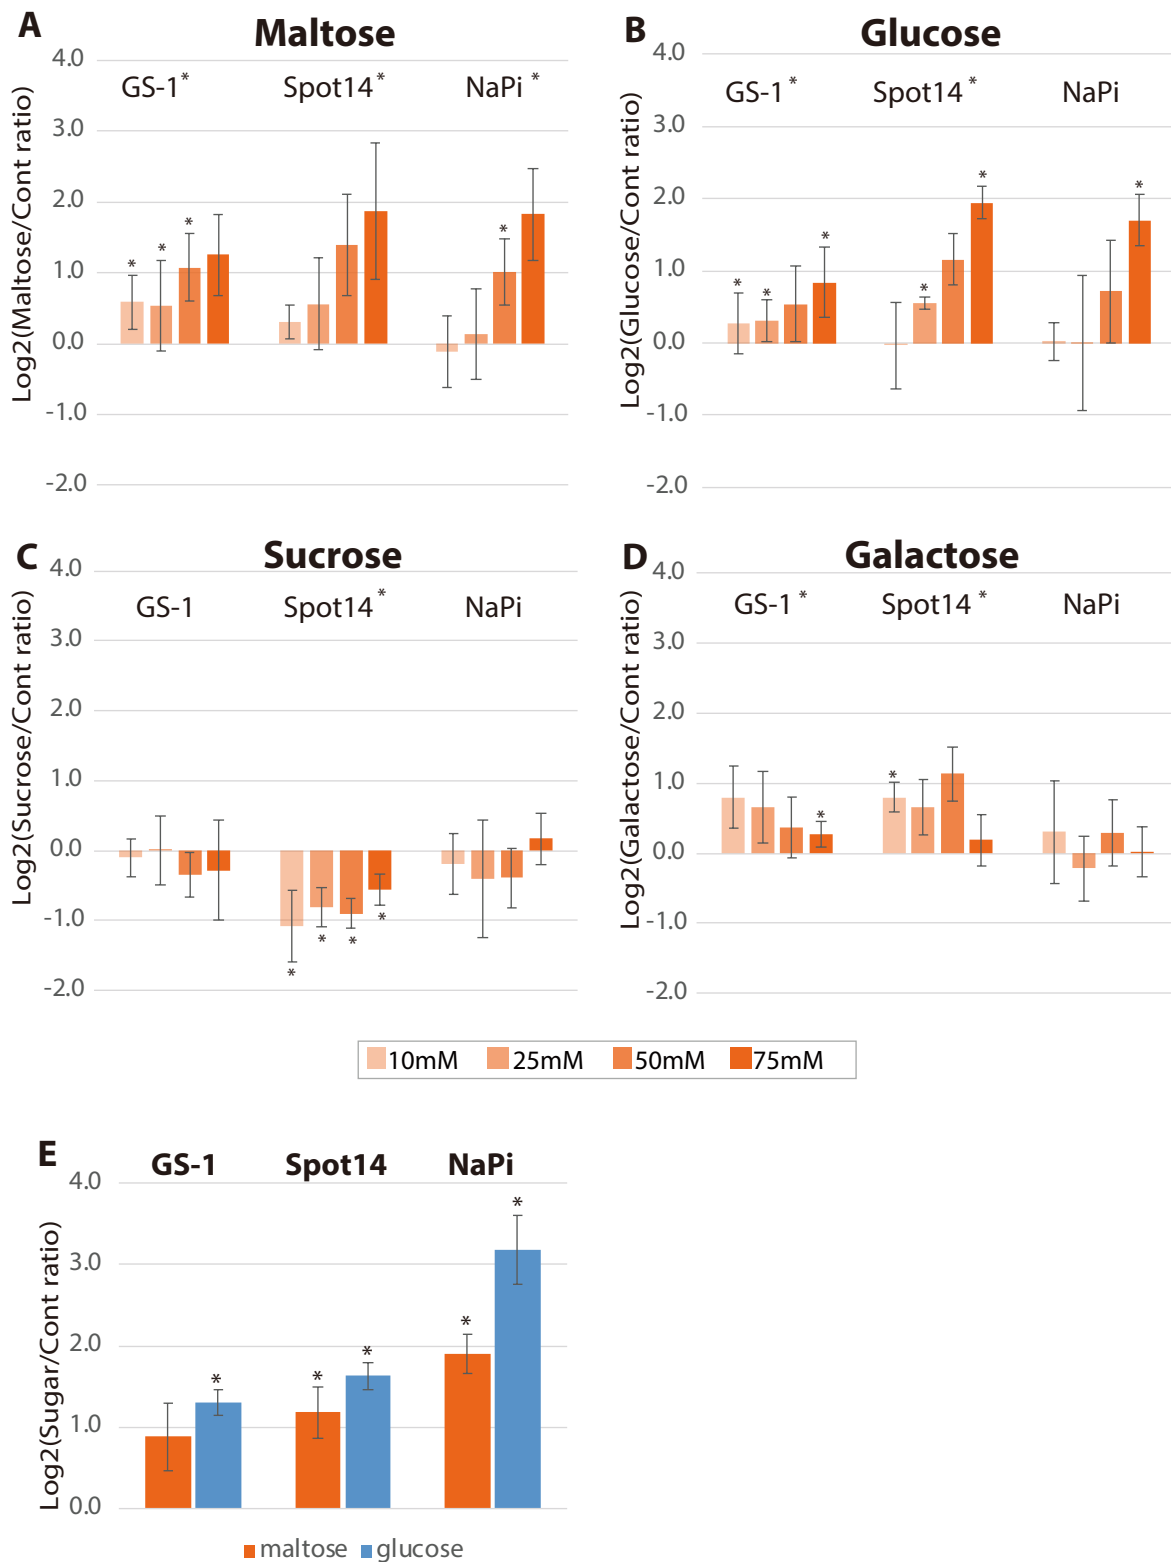

### Supplementary Figure 6. Effects of sugars on *Hydra* growth

Effects of growth in presence of maltose (A), glucose (B), sucrose (C) and galactose (D) on gene expression of GS-1, Spot14 and NaPi. *Hv\_Apo* were cultured in medium containing 10 mM, 25 mM, 50 mM or 75 mM of each sugar for 48 hours, and 75 mM maltose (orange) and glucose (blue) for 6 hours (E). RNA was extracted from the polyps in the light condition. Expression difference of the genes was examined by qPCR. The vertical axis is log scale (log<sub>2</sub>) fold change of relative expression level of sugar-treated hydras over controls. Error bars indicate standard deviation. T-test in each concentration and Kruskal-Wallis test in the series of 48 hours treatment were performed. \* p-value < 0.05

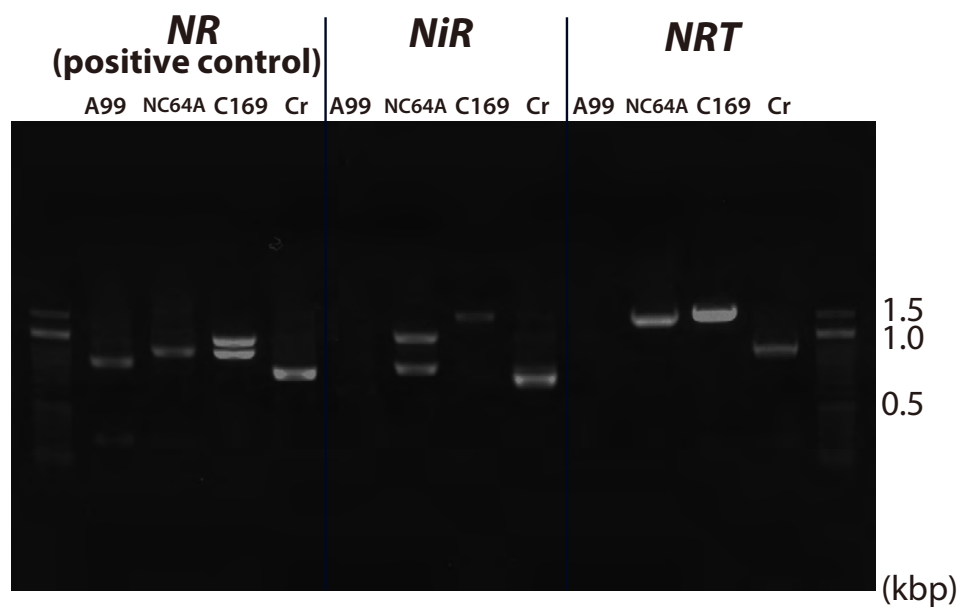

**Supplementary Figure 7. PCR of nitrate assimilation genes**

PCR amplification of genomic DNA corresponding to the genes *NRT2*, *NiR* and *NR* (positive control) was performed in *Chlorella* sp. A99 (A99), *Chlorella variabilis* NC64A (NC64A), *Coccomyxa subellipsoidea* C169 (C169) and *Chlamydomonas reinhardtii* (Cr).
